# Supplementary material for: Tree insect pests and pathogens: a global systematic review of their impacts in urban areas
Source: Springer Nature journal article supplement (doi:10.1007/s11252-022-01317-5), 2023-02-20
Supplement: MOESM2 [file 24048286]

**Tree insect pests and pathogens: a global systematic review of their impacts in urban setting; Urban Ecosystems; Raum, S. et al., Technical University Munich / Imperial College London, [susanne.raum@tum.de](mailto:susanne.raum@tum.de)**

**Supplementary Information SI 2 – Search strings, inclusion / exclusion criteria, coding parameters**

**Table 1:** Search strings used to access publications in bibliographic databases concerning impacts of urban tree insects / pathogens

| <b>Database</b>                                                                                                                                                                    | <b>Search Terms</b>                                                                                                                                                                                                                                                                                                                                                                                                                                                |
|------------------------------------------------------------------------------------------------------------------------------------------------------------------------------------|--------------------------------------------------------------------------------------------------------------------------------------------------------------------------------------------------------------------------------------------------------------------------------------------------------------------------------------------------------------------------------------------------------------------------------------------------------------------|
| <b>Scopus (Elsevier)</b><br>(www.scopus.com/search/form.uri?display=basic#basic<br>12.11.2021 – access through TUM)<br><b>1997 hits</b>                                            | ( TITLE-ABS-KEY ( ( urban OR city OR town OR peri-urban OR suburban OR metropolis ) AND ( "urban tree" OR "urban forest" OR "street tree" OR tree OR forest OR canopy ) AND ( pest OR insect OR disease OR pathogen ) AND ( impact OR effect OR risk OR threat OR mortality OR damage ) AND NOT ( "phylogenetic tree" OR "decision tree" OR "random forest" OR "forest regression" OR "family tree" OR "regression tree" OR rat OR bat OR rodent OR tick )         |
| <b>Web of Science Core Collection (Clarivate)</b><br>(https://www-webofscience-com.iclibezp1.cc.ic.ac.uk/wos/woscc/summary<br>(12.11.2021 – access through IC)<br><b>2229 hits</b> | TS=((urban OR city OR cities OR town* OR peri-urban OR suburban OR metropol*) AND ("urban tree*" OR "urban forest*" OR "street tree*" OR tree* OR forest* OR canop*) AND (pest OR pests OR insect* OR disease* OR pathogen*) AND (impact* OR effect* OR risk* OR threat* OR mortal* OR damage*) NOT ("phylogenetic tree*" OR "decision tree*" OR "random forest*" OR "forest regression*" "regression tree*" OR "family tree*"OR rat* OR bat* OR rodent* OR tick*) |
| <b>Science Direct** (Elsevier)</b><br>(https://www-sciencedirect-com.iclibezp1.cc.ic.ac.uk/<br>12.11.2021 – access through IC)<br><b>169 hits</b>                                  | (urban OR city) AND (tree OR forest) AND (pest OR disease) AND (impact OR effect OR risk)                                                                                                                                                                                                                                                                                                                                                                          |

\*Indicates truncated term to access word derivatives

\*\*Science Direct only allows a limited number of search terms

**Table 2:** Inclusion and exclusion criteria for document selection

| Inclusion criteria                                                                                                                                     | Exclusion criteria                                                                                                                                                        |
|--------------------------------------------------------------------------------------------------------------------------------------------------------|---------------------------------------------------------------------------------------------------------------------------------------------------------------------------|
| <b>Phase 1: initial keyword search</b>                                                                                                                 |                                                                                                                                                                           |
| All languages                                                                                                                                          | None                                                                                                                                                                      |
| Available in Scopus, Web of Science Core Collection, and Science Direct                                                                                | Not available in Scopus, Web of Science Core Collection, Science Direct, and Science Direct                                                                               |
| Primary research articles (peer-reviewed, scholarly journal publication)                                                                               | Others (e.g., meetings, proceedings, theses, books, book chapters, reports, reviews)                                                                                      |
| <b>Phase 2: keyword search in title and abstract review to select the studies on urban tree insects / pathogens</b>                                    |                                                                                                                                                                           |
| Studies located in North America, South America, European region including Turkey and Russia, Asia, Africa, Oceania, Global                            | Unspecified                                                                                                                                                               |
| Studies located in urban, peri-urban, suburban, urban fringe, town, city, metropolis areas                                                             | Rural, villages, unspecified                                                                                                                                              |
| Abstracts that use specified search terms or synonyms, including common and Latin names of cities, tree species and insect / pathogens                 | Abstracts that do not meet the two criteria: use of specific terms or synonyms, and explicit indication of the use of natural trees (e.g., bronchial tree, arterial tree) |
| Abstracts that did not use key terms from the above four groups, but clearly indicate studied system                                                   |                                                                                                                                                                           |
| The article must have electronically available abstracts and full texts                                                                                |                                                                                                                                                                           |
| <b>Phase 3: full-text review to select the studies whose impact and / risk description is sufficient for us to address the main research questions</b> |                                                                                                                                                                           |
| Apply content analysis techniques to the data to answer the research questions, using a set of predetermined coding parameters                         |                                                                                                                                                                           |

**Table 3:** Set of predetermined coding parameters

| <b>Category</b>                                          | <b>Type of data</b>                                                                                                                                                                                                                                                                                                         |
|----------------------------------------------------------|-----------------------------------------------------------------------------------------------------------------------------------------------------------------------------------------------------------------------------------------------------------------------------------------------------------------------------|
| <b>1. Bibliographic information</b>                      | a. Authors' names<br>b. Year of publication<br>c. Title<br>d. Publication source, i.e., journal<br>e. Countries, i.e., study location                                                                                                                                                                                       |
| <b>2. Information relating to the inclusion criteria</b> | a. City, i.e., study location<br>b. Insect / pathogen species<br>c. Tree species affected<br>d. Type and extend of impact<br>e. Environmental / ecological impacts (qual / quan)<br>f. Social impacts (qual / quan)<br>g. Economic impacts (qual / quan)<br>h. Relevance and / or magnitude of impact<br>i. Recommendations |
| <b>3. Information relating to the study</b>              | a. Aim of the study<br>b. Methodology employed (e.g., experimental or observations)<br>c. Size and type of study location<br>d. Time / duration of study                                                                                                                                                                    |
| <b>4. Additional information</b>                         | a. Symptoms of insect / pathogen outbreak<br>b. Relevance and / or magnitude of impact<br>c. Recommendations<br>d. Comments                                                                                                                                                                                                 |
