# Supplementary material for: Tree insect pests and pathogens: a global systematic review of their impacts in urban areas
Source: Springer Nature journal article supplement (doi:10.1007/s11252-022-01317-5), 2023-02-20
Supplement: MOESM3 [file 24048286]

**Tree insect pests and pathogens: a global systematic review of their impacts in urban setting; Urban Ecosystems; Raum, S. et al., Technical University Munich / Imperial College London, susanne.raum@tum.de**

**Supplementary Information S13 – List of included references**

| No. | Included Articles in Systematic Review on the Impacts of Tree Insects / Pathogens in Urban Settings                                                                                                                                                                                                                                                                                                   |
|-----|-------------------------------------------------------------------------------------------------------------------------------------------------------------------------------------------------------------------------------------------------------------------------------------------------------------------------------------------------------------------------------------------------------|
| 1.  | Afechtal, M., Chrif Smaili, M., & Abou Kubaa, R. (2021). First record of <i>Macrohomotoma gladiata</i> Kuwayama, 1908 (Hemiptera: Psylloidea: Homotomidae), a pest of ornamental <i>Ficus microcarpa</i> L. f., in Morocco. <i>EPPO Bulletin</i> , 51(2), 319-323.                                                                                                                                    |
| 2.  | Annesi, T., Calienno, L., Picchio, R., De Simone, D., & Lo Monaco, A. (2015). Degradation of some technological features in the wood of ornamental species caused by <i>Inonotus rickii</i> (Pat.) Reid. <i>Drewno. Prace Naukowe. Doniesienia. Komunikaty</i> , 58(195).                                                                                                                             |
| 3.  | Annesi, T., Coppola, R., & Motta, E. (2003). Decay and canker caused by <i>Inonotus rickii</i> spreading on more urban tree species. <i>Forest Pathology</i> , 33(6), 405-412.                                                                                                                                                                                                                        |
| 4.  | Arnberger, A., Schneider, I. E., Ebenberger, M., Eder, R., Venette, R. C., Snyder, S. A., ... & Cottrell, S. (2017). Emerald ash borer impacts on visual preferences for urban forest recreation settings. <i>Urban Forestry &amp; Urban Greening</i> , 27, 235-245.                                                                                                                                  |
| 5.  | Backe, K., Rousselet, J., Bernard, A., Frank, S., & Roques, A. (2021). Human health risks of invasive caterpillars increase with urban warming. <i>Landscape Ecology</i> , 36(5), 1475-1487.                                                                                                                                                                                                          |
| 6.  | Bernadovičová, S. (2008). Importance of <i>Cytospora</i> damage in relation to health state of birch trees in urban greenery—demonstrated by example of the Nitra town. <i>Folia Oecologica</i> , 35(2), 1-8.                                                                                                                                                                                         |
| 7.  | Bigsby, K. M., Ambrose, M. J., Tobin, P. C., & Sills, E. O. (2014). The cost of gypsy moth sex in the city. <i>Urban Forestry &amp; Urban Greening</i> , 13(3), 459-468.                                                                                                                                                                                                                              |
| 8.  | Bondareva, L. M., & Chumak, P. Y. (2018). <i>Pentamerismus taxi</i> (Haller, 1877)(Acari: Tenuipalpidae): A new pest in the conditions of Kyiv. <i>Russian Journal of Biological Invasions</i> , 9(1), 9-12.                                                                                                                                                                                          |
| 9.  | Bukowski, E. (2019). Using the commons to understand the Dutch elm disease epidemic in Syracuse, NY. <i>Geographical Review</i> , 109(2), 180-198.                                                                                                                                                                                                                                                    |
| 10. | Chen, C., Zhang, C., Li, S., Zhu, H., Fan, B., Wang, Y., ... & Hao, D. (2021). Biological traits and life history of <i>Pagiophloeus tsushimanus</i> (Coleoptera: Curculionidae), a weevil pest on camphor trees in China. <i>Journal of Forestry Research</i> , 32(5), 1979-1988.                                                                                                                    |
| 11. | Chouvenc, T., & Foley IV, J. R. (2018). <i>Coptotermes gestroi</i> (Wasmann)(Blattodea [Isoptera]: Rhinotermitidae), a threat to the southeastern Florida urban tree canopy. <i>Florida Entomologist</i> , 101(1), 79-90.                                                                                                                                                                             |
| 12. | Di Domenico, D., & Maistrello, L. (2014). About the presence of termites in Florence. <i>Redia</i> , 97, 177-182.                                                                                                                                                                                                                                                                                     |
| 13. | Dias, T. K. R., Pires, E. M., Souza, A. P., Tanaka, A. A., Monteiro, E. B., & Wilcken, C. F. (2017). The beetle <i>Costalimaita ferruginea</i> (Coleoptera: Chysomelidae) in Eucalyptus plantations in transition area of Amazon and Cerrado Biomes. <i>Brazilian Journal of Biology</i> , 78, 47-52.                                                                                                 |
| 14. | Dzięgielewska, M., Adamska, I., Mikiciuk, M., Nowak, G., & Ptak, P. (2017). Effects of biotic and abiotic factors on the health of horse chestnut trees in an urban area of north-western Poland. <i>Ecological Questions</i> , 27, 25-38.                                                                                                                                                            |
| 15. | Ferrari, J. P., & Pichenot, M. (1976). The canker stain disease of plane tree in Marseilles and in the south of France. <i>European Journal of Forest Pathology</i> , 6(1), 18-25.                                                                                                                                                                                                                    |
| 16. | Ferraz, H. G. M., Guimarães, L. M. S., Badel, J. L., Tótola, M. R., & Alfenas, A. C. (2017). Leaf blight and defoliation caused by two new pathovars of <i>Xanthomonas axonopodis</i> on <i>Schinus terebinthifolius</i> and <i>Mabea fistulifera</i> . <i>Plant Pathology</i> , 66(9), 1527-1538.                                                                                                    |
| 17. | Ferreira-Filho, P. J., Piña-Rodrigues, F., Silva, J., Guerreiro, J. C., Ghiotto, T. C., Piotrowski, I., ... & Zanuncio, J. C. (2015). The exotic wasp <i>Megastigmus transvaalensis</i> (Hymenoptera: Torymidae): first record and damage on the Brazilian peppertree, <i>Schinus terebinthifolius</i> drupes, in São Paulo, Brazil. <i>Anais da Academia Brasileira de Ciências</i> , 87, 2091-2095. |
| 18. | Fissore, C., McFadden, J. P., Nelson, K. C., Peters, E. B., Hobbie, S. E., King, J. Y., ... & Jakobsdottir, I. (2012). Potential impacts of emerald ash borer invasion on biogeochemical and water cycling in residential landscapes across a metropolitan region. <i>Urban Ecosystems</i> , 15(4), 1015-1030.                                                                                        |
| 19. | Grasso, F. M., Marini, M., Vitale, A., Firrao, G., & Granata, G. (2012). Canker and dieback on <i>Platanus x acerifolia</i> caused by <i>D. iaporthae scabra</i> . <i>Forest Pathology</i> , 42(6), 510-513.                                                                                                                                                                                          |
| 20. | Griffin, G. J. (2015). Status of thousand cankers disease on eastern black walnut in the eastern United States at two locations over 3 years. <i>Forest Pathology</i> , 45(3), 203-214.                                                                                                                                                                                                               |

|     |                                                                                                                                                                                                                                                                                                           |
|-----|-----------------------------------------------------------------------------------------------------------------------------------------------------------------------------------------------------------------------------------------------------------------------------------------------------------|
| 21. | Guthrie, R. J., Sullivan, J. J., & Buckley, H. L. (2008). Patterns of host damage by the cabbage tree monophage <i>Epiphyryne verriculata</i> Feld (Lepidoptera: Geometridae) across urban, rural and native forest habitats. <i>New Zealand Entomologist</i> , 31(1), 77-88.                             |
| 22. | Haack, R. A., Law, K. R., Mastro, V. C., Ossenburgen, H. S., & Raimo, B. J. (1997). New York's battle with the Asian long-horned beetle. <i>Journal of Forestry</i> , 95(12), 11-15.                                                                                                                      |
| 23. | Haight, R. G., Homans, F. R., Horie, T., Mehta, S. V., Smith, D. J., & Venette, R. C. (2011). Assessing the cost of an invasive forest pathogen: a case study with oak wilt. <i>Environmental Management</i> , 47(3), 506-517.                                                                            |
| 24. | Held, B. W., Simeto, S., Rajtar, N. N., Cotton, A. J., Showalter, D. N., Bushley, K. E., & Blanchette, R. A. (2021). Fungi associated with galleries of the emerald ash borer. <i>Fungal Biology</i> , 125(7), 551-559.                                                                                   |
| 25. | Hesler, L. S., Logan, T. M., Benenson, M. W., & Moser, C. (1999). Acute dermatitis from oak processionary caterpillars in a US military community in Germany. <i>Military Medicine</i> , 164(11), 767-770.                                                                                                |
| 26. | Izhevskii, S. S., & Mozolevskaya, E. G. (2010). <i>Agrilus planipennis</i> Fairmaire in Moscow ash trees. <i>Russian Journal of Biological Invasions</i> , 1(3), 153-155.                                                                                                                                 |
| 27. | Jürisoo, L., Adamson, K., Padari, A., & Drenkhan, R. (2019). Health of elms and Dutch elm disease in Estonia. <i>European Journal of Plant Pathology</i> , 154(3), 823-841.                                                                                                                               |
| 28. | Jürisoo, L., Selikhovkin, A. V., Padari, A., Shevchenko, S. V., Shcherbakova, L. N., Popovichev, B. G., & Drenkhan, R. (2021). The extensive damage to elms by Dutch elm disease agents and their hybrids in northwestern Russia. <i>Urban Forestry &amp; Urban Greening</i> , 63, 127214.                |
| 29. | Kelnarová, I., Černý, K., Zahradník, D., & Koukol, O. (2017). Widespread latent infection of <i>Cryptostroma corticale</i> in asymptomatic <i>Acer pseudoplatanus</i> as a risk for urban plantations. <i>Forest Pathology</i> , 47(4), e12344.                                                           |
| 30. | Kim, C. S., Jeong, J. Y., Cho, H. S., Lee, K. S., & Park, N. C. (2011). Carbon and nitrogen status in litterfall of a red pine stand with varying degrees of damage from pine wilt disease. <i>Journal of Ecology and Environment</i> , 34(2), 215-222.                                                   |
| 31. | Koenig, W. D., Liebhold, A. M., Bonter, D. N., Hochachka, W. M., & Dickinson, J. L. (2013). Effects of the emerald ash borer invasion on four species of birds. <i>Biological Invasions</i> , 15(9), 2095-2103.                                                                                           |
| 32. | Kondo, M. C., Han, S., Donovan, G. H., & MacDonald, J. M. (2017). The association between urban trees and crime: Evidence from the spread of the emerald ash borer in Cincinnati. <i>Landscape and Urban Planning</i> , 157, 193-199.                                                                     |
| 33. | Kondo, T., & Evans, G. (2012). <i>Singhiella simplex</i> (Singh)(Hemiptera: Aleyrodidae), a new aleyrodid invasive species for Colombia. <i>Boletín del Museo de Entomología de la Universidad del Valle</i> , 13(2), 31-34.                                                                              |
| 34. | Kopačka, M., Nachman, G., & Zemek, R. (2021). Seasonal Changes and the Interaction between the Horse Chestnut Leaf Miner <i>Cameraria ohridella</i> and Horse Chestnut Leaf Blotch Disease Caused by <i>Guignardia aesculi</i> . <i>Forests</i> , 12(7), 952.                                             |
| 35. | Koukol, O., Kelnarová, I., & Černý, K. (2015). Recent observations of sooty bark disease of sycamore maple in P rague (C zech R epublic) and the phylogenetic placement of <i>C rypstroma corticale</i> . <i>Forest Pathology</i> , 45(1), 21-27.                                                         |
| 36. | Kovač, M., Diminić, D., Orlović, S., & Zlatković, M. (2021). <i>Botryosphaeria dothidea</i> and <i>Neofusicoccum yunnanense</i> causing canker and dieback of <i>Sequoiadendron giganteum</i> in Croatia. <i>Forests</i> , 12(6), 695.                                                                    |
| 37. | Kovacs, K., Václavík, T., Haight, R. G., Pang, A., Cunniffe, N. J., Gilligan, C. A., & Meentemeyer, R. K. (2011). Predicting the economic costs and property value losses attributed to sudden oak death damage in California (2010–2020). <i>Journal of Environmental Management</i> , 92(4), 1292-1302. |
| 38. | Kulfan, J., Zach, P., Holec, J., Brown, P. M., Sarvašová, L., Skuhrovec, J., ... & Saniga, M. (2020). The invasive Box tree moth five years after introduction in Slovakia: Damage risk to Box trees in urban habitats. <i>Forests</i> , 11(9), 999.                                                      |
| 39. | Lanier, G. N., Schubert, D. C., & Manion, P. D. (1988). Dutch elm disease and elm yellows in central New York: out of the frying pan into the fire. <i>Plant Disease</i> , 72(3), 189-194.                                                                                                                |
| 40. | Lapointe, M., & Brisson, J. (2011). Tar spot disease on Norway maple in North America: quantifying the impacts of a reunion between an invasive tree species and its adventive natural enemy in an urban forest. <i>Ecoscience</i> , 18(1), 63-69.                                                        |
| 41. | Laverne, R. J., & Kellogg, W. A. (2019). Loss of urban forest canopy and the effects on neighborhood soundscapes. <i>Urban Ecosystems</i> , 22(2), 249-270.                                                                                                                                               |
| 42. | Lehtijärvi, A., Oskay, F., Doğmuş Lehtijärvi, H. T., Aday Kaya, A. G., Pecori, F., Santini, A., & Woodward, S. (2018). <i>Ceratocystis platani</i> is killing plane trees in Istanbul (Turkey). <i>Forest Pathology</i> , 48(1), e12375.                                                                  |
| 43. | Lemes, P. G., de Matos, M. F., Leite, G. L. D., Zanoncio, A. J. V., Soares, M. A., & Zanoncio, J. C. (2019). <i>Bauhinia variegata</i> (Fabaceae) dieback caused by <i>Praelongorthezia praelonga</i> (Hemiptera: Ortheziidae). <i>Florida Entomologist</i> , 102(3), 630-634.                            |

|     |                                                                                                                                                                                                                                                                                                                                                            |
|-----|------------------------------------------------------------------------------------------------------------------------------------------------------------------------------------------------------------------------------------------------------------------------------------------------------------------------------------------------------------|
| 44. | Li, X., Holmes, T. P., Boyle, K. J., Crocker, E. V., & Nelson, C. D. (2019). Hedonic analysis of forest pest invasion: the case of Emerald Ash Borer. <i>Forests</i> , 10(9), 820.                                                                                                                                                                         |
| 45. | Linaldeddu, B. T., Alves, A., & Phillips, A. J. L. (2016). <i>Sardiniella urbana</i> gen. et sp. nov., a new member of the Botryosphaeriaceae isolated from declining <i>Celtis australis</i> trees in Sardinian streetscapes. <i>Mycosphere</i> , 7(7), 893-905.                                                                                          |
| 46. | Lukášová, K., Holuša, J., & Knížek, M. (2014). <i>Dendroctonus micans</i> populations on <i>Picea pungens</i> in the center of a non-outbreak region contain few pathogens, parasites or predators: A new threat for urban forests? <i>Urban Forestry &amp; Urban Greening</i> , 13(4), 833-838.                                                           |
| 47. | Maggiore, G., Semeraro, T., Aretano, R., De Bellis, L., & Luvisi, A. (2019). GIS analysis of land-use change in threatened landscapes by <i>Xylella fastidiosa</i> . <i>Sustainability</i> , 11(1), 253.                                                                                                                                                   |
| 48. | Maier, H., Spiegel, W., Kinaciyan, T., Krehan, H., Cabaj, A., Schopf, A., & Hönigsmann, H. (2003). The oak processionary caterpillar as the cause of an epidemic airborne disease: survey and analysis. <i>British Journal of Dermatology</i> , 149(5), 990-997.                                                                                           |
| 49. | McKenney, D. W., Pedlar, J. H., Yemshanov, D., Barry Lyons, D., Campbell, K. L., & Lawrence, K. (2012). Estimates of the potential cost of emerald ash borer ( <i>Agrilus planipennis</i> Fairmaire) in Canadian municipalities. <i>Arboriculture and Urban Forestry</i> , 38(3), 81.                                                                      |
| 50. | Meshkova, V., Kukina, O., Zinchenko, O., & Davydenko, K. (2017). Three-year dynamics of common ash defoliation and crown condition in the focus of black sawfly <i>Tomostethus nigrinus</i> F.(Hymenoptera: Tenthredinidae). <i>Baltic Forestry</i> , 23(1), 303-308.                                                                                      |
| 51. | Miller, F. D. (1997). Effects and control of periodical cicada <i>Magicicada septendecim</i> and <i>Magicicada cassini</i> oviposition injury on urban forest trees. <i>Journal of Arboriculture</i> , 23, 225-232.                                                                                                                                        |
| 52. | Mindlin, M. J., Le Polain de Waroux, O., Case, S., & Walsh, B. (2012). The arrival of oak processionary moth, a novel cause of itchy dermatitis, in the UK: experience, lessons and recommendations. <i>Public Health</i> , 126(9), 778-781.                                                                                                               |
| 53. | Miyamoto, T., Masuya, H., Koizumi, A., Yamaguchi, T., Ishihara, M., Yamaoka, Y., ... & Ohara, M. (2019). A report of dieback and mortality of elm trees suspected of Dutch elm disease in Hokkaido, Japan. <i>Journal of Forest Research</i> , 24(6), 396-400.                                                                                             |
| 54. | Mohamed, H. W., Ahmed, A. E., Ezzat, M., Shaker, A. R., & Abdelwahed, S. S. (2016). First record and disease management of pinkrot in cocon palm trees in Egypt. <i>Scholar Research Library</i> , 8(10), 27-31.                                                                                                                                           |
| 55. | Nowak, D. J., Pasek, J. E., Sequeira, R. A., Crane, D. E., & Mastro, V. C. (2001). Potential effect of <i>Anoplophora glabripennis</i> (Coleoptera: Cerambycidae) on urban trees in the United States. <i>Journal of Economic Entomology</i> , 94(1), 116-122.                                                                                             |
| 56. | Oliveira, D. C., Prado, E. P., de Moraes, G. J., de Morais, E. G. F., Chagas, E. A., Gondim, M. G. C., & Navia, D. (2016). First report of <i>Raoiella indica</i> (Acari: Tenuipalpidae) in southeastern Brazil. <i>Florida Entomologist</i> , 99(1), 123-125.                                                                                             |
| 57. | Onstad, D. W., Nowak, D. J., & Jeffords, M. R. (1997). Potential defoliation of trees by outbreak populations of gypsy moth in the Chicago area. <i>Journal of Arboriculture</i> . 23 (2): 57-64., 23(2).                                                                                                                                                  |
| 58. | Orlova-Bienkowskaja, M.J. (2013). Dramatic Expansion of the Range of the Invasive Ash Pest, Buprestid Beetle <i>Agrilus planipennis</i> Fairmaire, 1888 (Coleoptera, Buprestidae) in European Russia. <i>Entomological Review</i> , 93 (9), 1121–1128.                                                                                                     |
| 59. | Ospanova, A. K., Kaliyeva, A. B., Anuarova, L. E., Bazargaliyeva, A. A., Yernazarova, G. I., Ramazanova, A. A., & Sekenov, I. E. (2018). Mildew of oleaster ( <i>Elaeagnus oxycarpa</i> Schlecht.) registered in large industrial cities (Pavlodar, Aksu, Ekibastuz) of the Pavlodar region. <i>Saudi Journal of Biological Sciences</i> , 25(3), 446-451. |
| 60. | Paap, T., De Beer, Z. W., Migliorini, D., Nel, W. J., & Wingfield, M. J. (2018). The polyphagous shot hole borer (PSHB) and its fungal symbiont <i>Fusarium euwallaceae</i> : a new invasion in South Africa. <i>Australasian Plant Pathology</i> , 47(2), 231-237.                                                                                        |
| 61. | Pedlar, J. H., McKenney, D. W., Hope, E., Reed, S., & Sweeney, J. (2020). Assessing the climate suitability and potential economic impacts of Oak wilt in Canada. <i>Scientific Reports</i> , 10(1), 1-12.                                                                                                                                                 |
| 62. | Pedlar, J. H., McKenney, D. W., Yemshanov, D., & Hope, E. S. (2020). Potential economic impacts of the Asian longhorned beetle (Coleoptera: Cerambycidae) in Eastern Canada. <i>Journal of Economic Entomology</i> , 113(2), 839-850.                                                                                                                      |
| 63. | Peregudova, E. Y. (2019). The Focus of the Emerald Ash Borer <i>Agrilus planipennis</i> Fairmaire (Coleoptera: Buprestidae) in Tver, on the Northwestern Border of the Invasive Range. <i>Russian Journal of Biological Invasions</i> , 10(3), 258-262.                                                                                                    |
| 64. | Perry, E., & McCain, A. H. (1988). Incidence and management of canker stain in London plane trees in Modesto. <i>California. Journal of Arboriculture</i> , 14(1).                                                                                                                                                                                         |
| 65. | Persad, A. B., & Tobin, P. C. (2015). Evaluation of Ash Tree Symptoms Associated with Emerald Ash Borer Infestation in Urban Forests. <i>Arboriculture &amp; Urban Forestry</i> , 41(2).                                                                                                                                                                   |

|     |                                                                                                                                                                                                                                                                                                               |
|-----|---------------------------------------------------------------------------------------------------------------------------------------------------------------------------------------------------------------------------------------------------------------------------------------------------------------|
| 66. | Pilotti, M., Ponzio, V., & Motta, E. (2002). Disorders of <i>Platanus acerifolia</i> in Italy associated with <i>Fusarium solani</i> . <i>Forest Pathology</i> , 32(4-5), 249-264.                                                                                                                            |
| 67. | Qi, Y. X., Pu, J. J., Zhang, X., Zhang, H., Lu, Y., Yu, Q. F., ... & Xie, Y. X. (2013). First report of dieback of mango caused by <i>Fusarium decemcellulare</i> in China. <i>Journal of Phytopathology</i> , 161(10), 735-738.                                                                              |
| 68. | Radonjić, S., & Hrnčić, S. (2017). First record of the alien psyllid <i>Macrohomonotoma gladiata</i> (Hemiptera Psylloidea Homotomidae) in Montenegro. <i>Redia</i> , 100, 77-80.                                                                                                                             |
| 69. | Rehab, M. A., Rashed, M. F., Ammar, M. I., & El-Morsy, S. A. (2014). Dieback and sooty canker of <i>Ficus</i> trees in Egypt and its control. <i>Pakistan Journal of Biological Sciences</i> , 17(3), 364-371.                                                                                                |
| 70. | Rodrigo, E., Bosch, A. M. S., Xamaní, P., & Laborda, R. (2019). Life cycle, parasitism and damage of <i>Xanthogaleruca luteola</i> (Muller) in Valencia (SE Spain): A preliminary study. <i>Urban Forestry &amp; Urban Greening</i> , 46, 126474.                                                             |
| 71. | Rossi, J. P., Imbault, V., Lamant, T., & Rousselet, J. (2016). A citywide survey of the pine processionary moth <i>Thaumetopoea pityocampa</i> spatial distribution in Orléans (France). <i>Urban Forestry &amp; Urban Greening</i> , 20, 71-80.                                                              |
| 72. | Ryall, K. L. (2010). Effects of larval host plant species on fecundity of the generalist insect herbivore <i>Ennomos subsignarius</i> (Lepidoptera: Geometridae). <i>Environmental Entomology</i> , 39(1), 121-126.                                                                                           |
| 73. | Sardaro, R., Grittani, R., Scrascia, M., Pazzani, C., Russo, V., Garganese, F., ... & Porcelli, F. (2018). The Red Palm Weevil in the city of Bari: A first damage assessment. <i>Forests</i> , 9(8), 452.                                                                                                    |
| 74. | Sarto i Monteys, V., Costa Ribes, A., & Savin, I. (2021). The invasive longhorn beetle <i>Xylotrechus chinensis</i> , pest of mulberries, in Europe: Study on its local spread and efficacy of abamectin control. <i>PLoS one</i> , 16(1), e0245527.                                                          |
| 75. | Schrader, G., Baker, R., Baranchikov, Y., Dumouchel, L., Knight, K. S., McCullough, D. G., ... & Gilioli, G. (2021). How does the Emerald Ash Borer ( <i>Agilus planipennis</i> ) affect ecosystem services and biodiversity components in invaded areas?. <i>EPPO Bulletin</i> , 51(1), 216-228.             |
| 76. | Seliutina, O. V., Shupranova, L. V., Holoborodko, K. K., Shulman, M. V., & Bobylev, Y. P. (2020). Effect of <i>Cameraria ohridella</i> on accumulation of proteins, peroxidase activity and composition in <i>Aesculus hippocastanum</i> leaves. <i>Regulatory Mechanisms in Biosystems</i> , 11(2), 299-304. |
| 77. | Šeruga Musić, M., Novokmet, M., & Novak, R. (2008). Distribution of phytoplasma diseases in the Lombardy poplar tree population of Zagreb urban area. <i>Acta Botanica Croatica</i> , 67(2), 119-130.                                                                                                         |
| 78. | Semeraro, T., Gatto, E., Buccolieri, R., Vergine, M., Gao, Z., De Bellis, L., & Luvisi, A. (2019). Changes in olive urban forests infected by <i>Xylella fastidiosa</i> : Impact on microclimate and social health. <i>International Journal of Environmental Research and Public Health</i> , 16(15), 2642.  |
| 79. | Shabunin, D.A., Selikhovkin, A.V., Varentsova, E.Y., & Musolin, D.L. (2020). Decline of <i>Fraxinus excelsior</i> L. in parks of Saint Petersburg: Who is to blame – <i>Hymenoscyphus fraxineus</i> or <i>Diplodia</i> spp.? <i>Forestry Studies</i> , 73, 43 - 51.                                           |
| 80. | Snieškiene, V., Baležentienė, L., & Stankeviciene, A. (2011). State of horse-chestnut, <i>Aesculus hippocastanum</i> L., in Lithuania: diseases and pest damages. <i>Ekologija</i> , 57(4).                                                                                                                   |
| 81. | Snyder, C., MacQuarrie, C. J., Zogas, K., Kruse, J. J., & Hard, J. (2007). Invasive species in the last frontier: distribution and phenology of birch leaf mining sawflies in Alaska. <i>Journal of Forestry</i> , 105(3), 113-119.                                                                           |
| 82. | Soltis, N. E., Gomez, S., Leisk, G. G., Sherwood, P., Preisser, E. L., Bonello, P., & Orians, C. M. (2014). Failure under stress: the effect of the exotic herbivore <i>Adelges tsugae</i> on biomechanics of <i>Tsuga canadensis</i> . <i>Annals of Botany</i> , 113(4), 721-730.                            |
| 83. | Storer, A. J., Wood, D. L., & Gordon, T. R. (2002). The epidemiology of pitch canker of Monterey pine in California. <i>Forest Science</i> , 48(4), 694-700.                                                                                                                                                  |
| 84. | Straka, T. J., Ridgway, R. L., Tichenor Jr, R. H., Hedden, R. L., & King, J. A. (1997). Cost analysis of a specialized gypsy moth management program for suburban parks. <i>Northern Journal of Applied Forestry</i> , 14(1), 32-39.                                                                          |
| 85. | Stravinskienė, V., Snieškienė, V., & Stankevicienė, A. (2015). Health condition of <i>Tilia cordata</i> Mill. trees growing in the urban environment. <i>Urban Forestry &amp; Urban Greening</i> , 14(1), 115-122.                                                                                            |
| 86. | Straw, N. A., Williams, D. T., Kulinich, O., & Gninenko, Y. I. (2013). Distribution, impact and rate of spread of emerald ash borer <i>Agilus planipennis</i> (Coleoptera: Buprestidae) in the Moscow region of Russia. <i>Forestry</i> , 86(5), 515-522.                                                     |
| 87. | Sweeney, J. D., Hughes, C., Zhang, H., Hillier, N. K., Morrison, A., & Johns, R. (2020). Impact of the invasive beech leaf-mining weevil, <i>Orchestes fagi</i> , on American beech in Nova Scotia, Canada. <i>Frontiers in Forests and Global Change</i> , 3, 46.                                            |
| 88. | Sydnor, T. D., Bumgardner, M., & Subburayalu, S. (2011). Community ash densities and economic impact potential of emerald ash borer ( <i>Agilus planipennis</i> ) in four Midwestern states. <i>Aboriculture &amp; Urban Forestry</i> , 37 (2): 84-89.                                                        |

|      |                                                                                                                                                                                                                                                                                                                                                                     |
|------|---------------------------------------------------------------------------------------------------------------------------------------------------------------------------------------------------------------------------------------------------------------------------------------------------------------------------------------------------------------------|
| 89.  | Templer, P. H., & McCann, T. M. (2010). Effects of the hemlock woolly adelgid on nitrogen losses from urban and rural northern forest ecosystems. <i>Ecosystems</i> , 13(8), 1215-1226.                                                                                                                                                                             |
| 90.  | Tuthill, R. W., Canada, A. T., Wilcock, K., Etkind, P. H., O'Dell, T. M., & Shama, S. K. (1984). An epidemiologic study of gypsy moth rash. <i>American Journal of Public Health</i> , 74(8), 799-803.                                                                                                                                                              |
| 91.  | Vakula, J., Zúbrik, M., Galko, J., Gubka, A., Kunca, A., Nikolov, C., ... & Zach, P. (2021). Is the double-spined bark beetle <i>Ips duplicatus</i> a new threat to <i>Picea omorika</i> in urban habitats?. <i>Plant Protection Science</i> , 57(3), 248-251.                                                                                                      |
| 92.  | Vaughn, C. D., Straka, T. J., Ham, D. L., Hedden, R. L., & Thorpe, K. W. (1997). Costs associated with urban gypsy moth control by arborists: a case study. <i>Journal of Arboriculture</i> , 23, 173-180.                                                                                                                                                          |
| 93.  | Vega, J. M., Moneo, I., Ortiz, J. C. G., Palla, P. S., Sanchís, M. E., Vega, J., ... & Roques, A. (2011). Prevalence of cutaneous reactions to the pine processionary moth ( <i>Thaumetopoea pityocampa</i> ) in an adult population. <i>Contact Dermatitis</i> , 64(4), 220-228.                                                                                   |
| 94.  | Verheyde, F., & Sioen, G. (2019). Outbreaks of <i>Tomostethus nigrinus</i> (Fabricius, 1804)(Hymenoptera, Tenthredinidae) on <i>Fraxinus angustifolia</i> 'Raywood'in Belgium. <i>Journal of Hymenoptera Research</i> , (72).                                                                                                                                       |
| 95.  | Volke, V., Knapp, S., & Roloff, A. (2019). Survey of <i>Hymenoscyphus fraxineus</i> in a central European urban area and exploration of its possible environmental drivers. <i>Urban Forestry &amp; Urban Greening</i> , 40, 165-173.                                                                                                                               |
| 96.  | Volkovitsh, M. G., Bieńkowski, A. O., & Orlova-Bienkowskaja, M. J. (2021). Emerald ash borer approaches the borders of the European Union and Kazakhstan and is confirmed to infest European ash. <i>Forests</i> , 12(6), 691.                                                                                                                                      |
| 97.  | Wang, Z., Li, Y., Ernstsons, A. S., Sun, R., Hulcr, J., & Gao, L. (2021). The infestation and habitat of the ambrosia beetle <i>Euwallacea interjectus</i> (Coleoptera: Curculionidae: Scolytinae) in the riparian zone of Shanghai, China. <i>Agricultural and Forest Entomology</i> , 23, 104–109.                                                                |
| 98.  | Withers, T. M., Potter, K. J., Berndt, L. A., Forgie, S. A., Paynter, Q. E., & Kriticos, D. J. (2011). Risk posed by the invasive defoliator <i>Uraba lugens</i> to New Zealand native flora. <i>Agricultural and Forest Entomology</i> , 13(1), 99-110.                                                                                                            |
| 99.  | Zheng, X. L., Su, J., He, H. X., Yang, J. H., Kong, L. P., Yang, M., ... & Lu, W. (2016). Incidences on Eucalyptus of Two Wood-boring Insects, <i>Batocera horsfieldi</i> Hope, 1839 (Coleoptera: Cerambycidae) and <i>Endoclita signifer</i> Waller, 1856 (Lepidoptera: Hepialidae) in China. <i>Journal of the Entomological Research Society</i> , 18(2), 23-31. |
| 100. | Zorzenon, F. J., & Campos, A. E. C. (2015). Subterranean termites in urban forestry: tree preference and management. <i>Neotropical Entomology</i> , 44(2), 180-185.                                                                                                                                                                                                |
