# Supplementary material for: Tree insect pests and pathogens: a global systematic review of their impacts in urban areas
Source: Springer Nature journal article supplement (doi:10.1007/s11252-022-01317-5), 2023-02-20
Supplement: MOESM4 [file 24048286]

**Tree insect pests and pathogens: a global systematic review of their impacts in urban setting; Urban Ecosystems; Raum, S. et al., Technical University Munich / Imperial College London, susanne.raum@tum.de**

**Supplementary Information SI4 – List of excluded references**

| No. | Full Details of Excluded References                                                                                                                                                                                                                                                                                                                                                  | Reasons for Exclusion            |
|-----|--------------------------------------------------------------------------------------------------------------------------------------------------------------------------------------------------------------------------------------------------------------------------------------------------------------------------------------------------------------------------------------|----------------------------------|
| 1   | Ak, K., Güçlü, S. & Tuncer, C. (2010). A new kiwi fruit pest, <i>Lymantria coryli</i> (Perris, 1853) (Coleoptera: Scolytidae) in Turkey. <i>Türk. entomol. derg.</i> , 2010, 34 (3): 391-397                                                                                                                                                                                         | No full text in English          |
| 2   | Anderson, T., & Dragicevic, S. (2016). A geosimulation approach for data scarce environments: modeling dynamics of forest insect infestation across different landscapes. <i>ISPRS International Journal of Geo-Information</i> , 5(2), 9.                                                                                                                                           | Wrong topic                      |
| 3   | Andrianjara, I.; Bordenave-Jacquemin, M.; Roy, V.; Cabassa, C.; Federici, P.; Carmignac, D.; Marcangeli, Y.; Rouhan, G.; Renard, M.; Nold, F.; Lata, J. C.; Genet, P.; Planchais, S. (2021). Urban tree management: Diversity of <i>Tilia</i> genus in streets and parks of Paris based on morphological and genetic characteristics. <i>Urban Forestry and Urban Greening</i> , 66. | Wrong topic                      |
| 4   | Araújo, Y. R. V., Moreira, Z. C. G., Borges, L. A. C., de Souza, Á. N., & Coelho Junior, L. M. (2019). Urban forest evaluation of João Pessoa city, Paraíba, Brazil. <i>Scientia Forestalis</i> , (121), 71-82.                                                                                                                                                                      | No full text in English          |
| 5   | Arnberger, A., Schneider, I. E., Eder, R., & Choi, A. (2020). Differences in urban forest visitor preferences for emerald ash borer-impacted areas. <i>Forestry: An International Journal of Forest Research</i> , 93(2), 225-238.                                                                                                                                                   | Wrong topic                      |
| 6   | Augustin, S., Guichard, S., Heitland, W., Freise, J., Svatoš, A., & Gilbert, M. (2009). Monitoring and dispersal of the invading Gracillariidae <i>Cameraria ohridella</i> . <i>Journal of Applied Entomology</i> , 133(1), 58-66.                                                                                                                                                   | Literature Review                |
| 7   | Augustin, S., Guichard, S., Svatoš, A., & Gilbert, M. (2004). Monitoring the regional spread of the invasive leafminer <i>Cameraria ohridella</i> (Lepidoptera: Gracillariidae) by damage assessment and pheromone trapping. <i>Environmental Entomology</i> , 33(6), 1584-1592.                                                                                                     | No clear urban/rural distinction |
| 8   | Aukema, J. E., Leung, B., Kovacs, K., Chivers, C., Britton, K. O., Englin, J., ... & Von Holle, B. (2011). Economic impacts of non-native forest insects in the continental United States. <i>PLoS one</i> , 6(9), e24587.                                                                                                                                                           | No clear urban/rural distinction |
| 9   | Aukema, J. E., McCullough, D. G., Von Holle, B., Liebhold, A. M., Britton, K., & Frankel, S. J. (2010). Historical accumulation of nonindigenous forest pests in the continental United States. <i>BioScience</i> , 60(11), 886-897.                                                                                                                                                 | No clear urban/rural distinction |
| 10  | Bai, L., Tian, C.M., Hong, C.H. .... Liu, H.G. (2015). The relationship between pine forest landscape patterns and pine wilt disease in Yichang, Hubei Province. <i>Acta Ecologica Sinica</i> , 35(24), 8107-8116.                                                                                                                                                                   | No full text in English          |
| 11  | Bancroft, J.S., Smith, M.T., Dispersal and influences on movement for <i>Anoplophora glabripennis</i> calculated from individual mark-recapture (2005). <i>Entomol. Exp. Appl</i> , 116 (2), pp. 83-92.                                                                                                                                                                              | Wrong setting                    |
| 12  | Baranchikov, Y., Mozolevskaya, E., Yurchenko, G., & Kenis, M. (2008). Occurrence of the emerald ash borer, <i>Agrilus planipennis</i> in Russia and its potential impact on European forestry. <i>EPPD bulletin</i> , 38(2), 233-238.                                                                                                                                                | Literature Review                |
| 13  | Bari, L., Dimini, D., Glavaš, M., & Hrašovec, B. (2008). THE HEALTH CONDITION OF URBAN TREES IN PAKRAC WITH A SPECIAL FOCUS ON LEAF DISEASES AND INSECT PESTS. <i>Radovi</i> , 43(1), 59-69.                                                                                                                                                                                         | No full text in English          |
| 14  | Zhukova, E. A., Morozova, O. V., Volobuev, S. V., & Bryantseva, Y. S. (2017). Basidiale Makromyceten und ihr Einfluss auf den Zustand der Grünflächen der Gärten des Russischen Museums (St. Petersburg). <i>Mykologie und Phytopathologie</i> , 51(6).                                                                                                                              | No full text available           |
| 15  | Bastian, R. A., & Hart, E. R. (1990). First-generation parasitism of the mimosa webworm (Lepidoptera: Plutellidae) by <i>Elasmus albizziae</i> (Hymenoptera: Eulophidae) in an urban forest. <i>Environmental entomology</i> , 19(2), 409-414.                                                                                                                                       | No specific impact               |
| 16  | Baumgartner, K., & Rizzo, D. M. (2001). Distribution of <i>Armillaria</i> species in California. <i>Mycologia</i> , 93(5), 821-830.                                                                                                                                                                                                                                                  | No specific impact               |

|    |                                                                                                                                                                                                                                                                                                      |                                           |
|----|------------------------------------------------------------------------------------------------------------------------------------------------------------------------------------------------------------------------------------------------------------------------------------------------------|-------------------------------------------|
| 17 | Bernadovicová, S., & Ivanová, H. (2008). Leaf spot disease on <i>Tilia cordata</i> caused by the fungus <i>Cercospora microsora</i> . <i>Biologia</i> , 63(1), 44-49.                                                                                                                                | No specific impact                        |
| 18 | Bily, D. S., Diehl, S. V., Cook, M., Wallace, L. E., Sims, L. L., Watson, C., & Baird, R. E. (2018). Temporal and locational variations of a <i>Phytophthora</i> spp. community in an urban forested water drainage and stream-runoff system. <i>Southeastern Naturalist</i> , 17(1), 176-201.       | Wrong topic                               |
| 19 | Blood, R. R. Y., Carraro, T. D. A., Figueiredo, J. G., & Mio, L. L. M. D. (2020). Persimmon anthracnose: a comparative study of aggressiveness on shoot and fruit among <i>Colletotrichum horii</i> isolates in southern Brazil. <i>Ciência Rural</i> , 50.                                          | No full text in English                   |
| 20 | Boland, J. M.; Woodward, D. L. (2019). Impacts of the invasive shot hole borer ( <i>Euwallacea kuroshio</i> ) are linked to sewage pollution in southern California: the Enriched Tree Hypothesis. <i>PeerJ</i> 7.                                                                                   | Wrong setting                             |
| 21 | Branco, M., Nunes, P., Roques, A., Fernandes, M. R., Orazio, C., & Jactel, H. (2019). Urban trees facilitate the establishment of non-native forest insects. <i>NeoBiota</i> , 52, 25-46.                                                                                                            | Literature Review                         |
| 22 | Brockerhoff, E. G., Dick, M., Ganley, R., Roques, A., & Storer, A. J. (2016). Role of insect vectors in epidemiology and invasion risk of <i>Fusarium circinatum</i> , and risk assessment of biological control of invasive <i>Pinus contorta</i> . <i>Biological Invasions</i> , 18(4), 1177-1190. | Literature Review                         |
| 23 | Brockerhoff, E. G., Liebhold, A. M., Richardson, B., & Suckling, D. M. (2010). Eradication of invasive forest insects: concepts, methods, costs and benefits. <i>New Zealand Journal of Forestry Science</i> . 40 suppl.: S117-S135., 40(suppl), S117-S135.                                          | Literature Review                         |
| 24 | Brown, W. P., & Zuefle, M. E. (2009). Does the periodical cicada, <i>Magicicada septendecim</i> , prefer to oviposit on native or exotic plant species? <i>Ecological Entomology</i> , 34(3), 346-355.                                                                                               | Wrong setting                             |
| 25 | Buchelos, C. T.; Papadopoulou, S.; Chrysohoides, C.; Nota, I. (2017). List of trees and shrubs infested by <i>Kaloterme flavicollis</i> (Kalotermitidae) in Greece. <i>EPPO Bulletin</i> 47(2):269-273.                                                                                              | Wrong topic                               |
| 26 | Bulaji?, A., Djeki?, I., Jovi?, J., Krnjaji?, S., Vu?urovi?, A., & Krsti?, B. (2010). <i>Phytophthora ramorum</i> occurrence in ornamentals in Serbia. <i>Plant Disease</i> , 94(6), 703-708.                                                                                                        | Wrong Topic                               |
| 27 | Cappaert, D., McCullough, D. G., Poland, T. M., & Siegert, N. W. (2005). Emerald ash borer in North America: a research and regulatory challenge. <i>American Entomologist</i> . 51 (3): 152-165., 51(3).                                                                                            | Literature Review                         |
| 28 | Castagnoli, M., Lewandowski, M., Labanowski, G. S., Simoni, S., & Soika, G. M. (2009). An insight into some relevant aspects concerning eriophyoid mites inhabiting forests, ornamental trees and shrubs. <i>Eriophyoid mites: progress and prognoses</i> , 169-189.                                 | Literature Review                         |
| 29 | Chireceanu, C., Chiriloaie, A., Teodoru, A., & Sivu, C. (2015). Contribution to knowledge of the gall insects and mites associated with plants in southern Romania. <i>Scientific Papers, Series B</i> , 59, 27-36.                                                                                  | Multiple insect/pathogen and tree species |
| 30 | Chirkov, S. N., & Prikhod'Ko, Y. N. (2015). Genetic diversity and population structure of Plum pox virus in Russia. <i>AGRICULTURAL BIOLOGY</i> , 5, 529-539.                                                                                                                                        | No full text in English                   |
| 31 | Chung, C. L., Huang, S. Y., Huang, Y. C., Tzean, S. S., Ann, P. J., Tsai, J. N., ... & Liou, R. F. (2015). The genetic structure of <i>Phellinus noxius</i> and dissemination pattern of brown root rot disease in Taiwan. <i>PLoS One</i> , 10(10), e0139445.                                       | No specific impact                        |
| 32 | Cleary, M. R., Blomquist, M., Vetukuri, R. R., B÷hlenius, H., & Witzell, J. (2017). Susceptibility of common tree species in Sweden to <i>Phytophthora cactorum</i> , <i>P. ácambivora</i> and <i>P. áplurivora</i> . <i>Forest Pathology</i> , 47(3), e12329.                                       | No clear urban/rural distinction          |
| 33 | Cleary, M., Ghasemkhani, M., Blomquist, M., & Witzell, J. (2016). First report of <i>Phytophthora gonapodyides</i> causing stem canker on European beech ( <i>Fagus sylvatica</i> ) in Southern Sweden. <i>Plant Disease</i> , 100(10), 2174.                                                        | No specific impact                        |
| 34 | Cleary, M., Oskay, F., Rönnberg, J., & Woodward, S. (2018). First report of <i>Pleuroceras pseudoplatani</i> on <i>Acer rubrum</i> , <i>A. griseum</i> , <i>A. saccharinum</i> , <i>A. negundo</i> , <i>A. circinatum</i> and <i>A. macrophyllum</i> in Scotland. <i>Forestry Chronicle</i> .        | Wrong setting                             |
| 35 | Clem, C. S., & Held, D. W. (2018). Associational Interactions Between Urban Trees: Are Native Neighbors Better Than Non-Natives? <i>Environmental entomology</i> , 47(4), 881-889.                                                                                                                   | Multiple insect/pathogen and tree species |
| 36 | Coffelt, M. A., & Schultz, P. B. (1992). Parasitism of orangestriped oakworm (Lepidoptera: Saturniidae) eggs in the urban landscape. <i>Biological Control</i> , 2(4), 306-311.                                                                                                                      | Wrong topic                               |

|    |                                                                                                                                                                                                                                                                                                                                                                                   |                                           |
|----|-----------------------------------------------------------------------------------------------------------------------------------------------------------------------------------------------------------------------------------------------------------------------------------------------------------------------------------------------------------------------------------|-------------------------------------------|
| 37 | Colunga-Garcia, M.; Haack, R. A.; Adelaja, A. O. (2009). Freight transportation and the potential for invasions of exotic insects in urban and Periurban Forests of the United States. <i>Journal of Economic Entomology</i> 102(1):237-246                                                                                                                                       | Wrong topic                               |
| 38 | Cregg, B. M., & Dix, M. E. (2001). Tree moisture stress and insect damage in urban areas in relation to heat island effects. <i>Journal of Arboriculture</i> , 27(1), 8-17.                                                                                                                                                                                                       | Multiple insect/pathogen and tree species |
| 39 | Crouch, C. D., Grady, A. M., Wilhelmi, N. P., Hofstetter, R. W., DePinte, D. E., & Waring, K. M. (2021). Oystershell scale: an emerging invasive threat to aspen in the southwestern US. <i>Biological Invasions</i> , 23(9), 2893-2912.                                                                                                                                          | No clear urban/rural distinction          |
| 40 | Crous, C. J., Burgess, T. I., Le Roux, J. J., Richardson, D. M., Slippers, B., & Wingfield, M. J. (2017). Ecological disequilibrium drives insect pest and pathogen accumulation in non-native trees. <i>AoB Plants</i> , 9(1), plw081.                                                                                                                                           | Literature Review                         |
| 41 | Cuddington, K.; Sobek-Swant, S.; Crosthwaite, J. C.; Lyons, D. B.; Sinclair, B. J. (2018). Probability of emerald ash borer impact for Canadian cities and North America: a mechanistic model. <i>Biological Invasions</i> 20(9):2661-2677.                                                                                                                                       | Wrong topic                               |
| 42 | Cui, X., Shu, H., Jiang, L., ... Guo, S. (2018). Identification of pathogens causing brown spot and the role of MeJA in disease resistance in <i>Stevia rebaudiana</i> . <i>Scientia Agricultura Sinica</i> 51 (18), 3520-3530.                                                                                                                                                   | No full text in English                   |
| 43 | da Silva Junior, J. G.; Peres-Filho, O.; Dorval, A.; de Souza, M. D.; do Nascimento, D. A. (2017). Case record, <i>Hypothenemus seriatus</i> Eichhoff, 1872 (Coleoptera: Scolytinae) in fruit of Babaçu in the city of Nossa Senhora do Livramento, Mato Grosso, Brazil. <i>Revista Espacios</i> 38(28).                                                                          | No full text in English                   |
| 44 | Dale, A. G.; Frank, S. D. (2014). The effects of urban warming on herbivore abundance and street tree condition. <i>PLOS ONE</i> 9(7).                                                                                                                                                                                                                                            | Wrong topic                               |
| 45 | Dale, A. G.; Frank, S. D. (2017). Warming and drought combine to increase pest insect fitness on urban trees. <i>PLOS ONE</i> 12(3).                                                                                                                                                                                                                                              | Wrong topic                               |
| 46 | D'ALMEIDA, Y. A., Lys, J. A., Neuenschwander, P., & Ajuonu, O. (1998). Impact of two accidentally introduced <i>Encarsia</i> species (Hymenoptera: Aphelinidae) and other biotic and abiotic factors on the spiralling whitefly <i>Aleurodicus dispersus</i> (Russell) (Homoptera: Aleyrodidae), in Benin, West Africa. <i>Biocontrol Science and Technology</i> , 8(1), 163-173. | Wrong Topic                               |
| 47 | Daniels, D. A., Nix, K. A., Wadl, P. A., Vito, L. M., Wiggins, G. J., Windham, M. T., ... & Hadziabdic, D. (2016). Thousand cankers disease complex: a forest health issue that threatens <i>Juglans</i> species across the US. <i>Forests</i> , 7(11), 260.                                                                                                                      | Literature Review                         |
| 48 | Darr, M. N., & Coyle, D. R. (2021). Fall Cankerworm (Lepidoptera: Geometridae), a Native Defoliator of Broadleaved Trees and Shrubs in North America. <i>Journal of Integrated Pest Management</i> , 12(1), 23.                                                                                                                                                                   | Literature Review                         |
| 49 | Demina, G. V., Prokhorenko, N. B., & Zakirov, B. R. (2017). PHYTOSANITARY STATE OF KAZAN CENTER GREEN PLANTATIONS. <i>INDO AMERICAN JOURNAL OF PHARMACEUTICAL SCIENCES</i> , 4(9), 3090-3094.                                                                                                                                                                                     | Multiple insect/pathogen and tree species |
| 50 | Desprez-Loustau, M. L.; Balci, Y.; Cornara, D.; Gonthier, P.; Robin, C.; Jacques, M. A. (2021). Is <i>Xylella fastidiosa</i> a serious threat to European forests? <i>Forestry</i> 94(1):1-17.                                                                                                                                                                                    | Wrong setting                             |
| 51 | Ding, S., Hu, H., & Gu, J. D. (2020). Diversity, Abundance, and Distribution of Wood-Decay Fungi in Major Parks of Hong Kong. <i>Forests</i> , 11(10), 1030.                                                                                                                                                                                                                      | Multiple insect/pathogen and tree species |
| 52 | do Nascimento Machado, D., Costa, E. C., Perini, C. R., Ugalde, G. A., Saldanha, M. A., Leitão, J. V., ... & Rivera, A. C. (2019). The ongoing dispersion of the Eucalyptus bronze bug ( <i>Thaumastocoris peregrinus</i> ) in Spain. <i>Forest Systems</i> , 28(3), eSC03-eSC03.                                                                                                 | No specific impact                        |
| 53 | Dodds, K. J., & Orwig, D. A. (2011). An invasive urban forest pest invades natural environments—Asian longhorned beetle in northeastern US hardwood forests. <i>Canadian Journal of Forest Research</i> , 41(9), 1729-1742.                                                                                                                                                       | Wrong setting                             |
| 54 | Donovan, G. H., Butry, D. T., Michael, Y. L., Prestemon, J. P., Liebhold, A. M., Gatzliolis, D., & Mao, M. Y. (2013). The relationship between trees and human health: evidence from the spread of the emerald ash borer. <i>American journal of preventive medicine</i> , 44(2), 139-145.                                                                                        | No clear urban/rural distinction          |
| 55 | EFSA Panel on Plant Health (PLH). (2014). Scientific Opinion on the pest categorisation of <i>Ceratocystis platani</i> (Walter) Engelbrecht et Harrington. <i>EFSA Journal</i> , 12(10), 3858.                                                                                                                                                                                    | Literature Review                         |

|    |                                                                                                                                                                                                                                                                                                    |                                  |
|----|----------------------------------------------------------------------------------------------------------------------------------------------------------------------------------------------------------------------------------------------------------------------------------------------------|----------------------------------|
| 56 | Erkan, N. (2011). Impact of pine processionary moth ( <i>Thaumetopoea wilkinsoni</i> Tams) on growth of Turkish red pine ( <i>Pinus brutia</i> Ten.). <i>African Journal of Agricultural Research</i> , 6(21), 4983-4988.                                                                          | Wrong setting                    |
| 57 | Ermolaev, I. (2019). Ecological mechanisms of nonperiodical population wave: a case study of the poplar leafminer- <i>Phyllonorycter populifoliella</i> (Lepidoptera, Gracillariidae). <i>ZHURNAL OBSHCHEI BIOLOGII</i> , 80(6), 451-476.                                                          | No full text in English          |
| 58 | Ezhov, O. N. (2016). Aphyllophorales in the urban plantations of Arkhangelsk Region. <i>Izv. VUZov. Lesnoj zhurnal</i> , (2), 59-68.                                                                                                                                                               | No full text in English          |
| 59 | Fernandez Winzer, L., Berthon, K. A., Carnegie, A. J., Pegg, G. S., & Leishman, M. R. (2019). <i>Austropuccinia psidii</i> on the move: survey based insights to its geographical distribution, host species, impacts and management in Australia. <i>Biological Invasions</i> , 21(4), 1215-1225. | No clear urban/rural distinction |
| 60 | Ferracini, C., & Alma, A. (2014). Evaluation of the community of native eulophid parasitoids on <i>Cameraria ohridella</i> Deschka and Dimic in urban areas. <i>Environmental entomology</i> , 36(5), 1147-1153.                                                                                   | No specific impact               |
| 61 | Firsov, G.A., Malysheva, V., Malysheva, E., ..., Volchanskaya, A.V. (2016). New data on distribution of phytophthora species and their influence on woody plants in the Botanical Garden of Peter the Great (Bin Ras, St. Petersburg). <i>Mikologiya i Fitopatologiya</i> 50(6):401-414            | No full text in English          |
| 62 | Foran, C. M.; Baker, K. M.; Narcisi, M. J.; Linkov, I. (2015). Susceptibility assessment of urban tree species in Cambridge, MA, from future climatic extremes. <i>Environment Systems and Decisions</i> ;35(3):389-400.                                                                           | Wrong topic                      |
| 63 | Foss, L. K., & Rieske, L. K. (2003). Species-specific differences in oak foliage affect preference and performance of gypsy moth caterpillars. <i>Entomologia Experimentalis et Applicata</i> , 108(2), 87-93.                                                                                     | No clear urban/rural distinction |
| 64 | Frank, S. D. (2021). Review of the direct and indirect effects of warming and drought on scale insect pests of forest systems. <i>Forestry: An International Journal of Forest Research</i> , 94(2), 167-180.                                                                                      | Literature Review                |
| 65 | Frank, S. D., Klingeman III, W. E., White, S. A., & Fulcher, A. (2013). Biology, injury, and management of maple tree pests in nurseries and urban landscapes. <i>Journal of Integrated Pest Management</i> , 4(1), B1-B14.                                                                        | Literature Review                |
| 66 | Fuentes, A. H.; Valdivia, W. N.; Clericus, J. A.; Alegría, F. M. (2011). Composition and classification of insect damage on <i>Nothofagus glauca</i> (Fagaceae), Maule Region, Chile. <i>Revista Colombiana de Entomología</i> , 37(1), 56-61.                                                     | Wrong setting                    |
| 67 | Fujihara, M., Toyohara, G., Hada, Y., & Iwatsuki, Z. (1992). Successional stages and degree of damage of secondary pine forests in Hiroshima City, western Japan. <i>Japanese Journal of Ecology</i> , 42(1), 71-79.                                                                               | No full text in English          |
| 68 | Gao, L., Wang, J., Wang, Z., Li, Y., & Ju, R. (2020). Morphological characteristics and occurrence status of the dangerous pest, <i>Acanthotomicus suncei</i> (Coleoptera: Curculionidae: Scolytinae). <i>Sci. Silvae Sin</i> , 56, 193-198.                                                       | No full text in English          |
| 69 | Gazal, V., Bailez, O., & Viana-Bailez, A. M. (2019). Termite (Isoptera) survey in urban area in Northern of Rio de Janeiro State, Brazil. <i>Revista Colombiana de Entomología</i> , 45(1).                                                                                                        | No specific impact               |
| 70 | Ghelardini, L., Pepori, A. L., Luchi, N., Capretti, P., & Santini, A. (2016). Drivers of emerging fungal diseases of forest trees. <i>Forest Ecology and Management</i> , 381, 235-246.                                                                                                            | Literature Review                |
| 71 | Godefroid, M., Meurisse, N., Groenen, F., Kerdelhué, C., & Rossi, J. P. (2020). Current and future distribution of the invasive oak processionary moth. <i>Biological Invasions</i> , 22(2), 523-534.                                                                                              | No clear urban/rural distinction |
| 72 | Goncalves, A. M., Molina, R. D. O., Carvalho Nunes, W. M. D., & Zanutto, C. A. (2008). Incidence of <i>Dilobopterus costalimai</i> Young and <i>Acrogonia citrina</i> Marucci & Cavichioli, in citrus orchards in Northwestern Parana. <i>ACTA SCIENTIARUM-AGRONOMY</i> , 30(3), 321-324.          | No full text in English          |
| 73 | Graziosi, I., Tembo, M., Kuate, J., & Muchugi, A. (2020). Pests and diseases of trees in Africa: A growing continental emergency. <i>Plants, People, Planet</i> , 2(1), 14-28.                                                                                                                     | Literature Review                |
| 74 | Greene, C. S. & Millward, A. A. (2017). The legacy of past tree planting decisions for a city confronting emerald ash borer ( <i>Agrilus planipennis</i> ) invasion. <i>Frontiers in Ecology and Evolution</i> 4.                                                                                  | Wrong topic                      |

|    |                                                                                                                                                                                                                                                                                                            |                                  |
|----|------------------------------------------------------------------------------------------------------------------------------------------------------------------------------------------------------------------------------------------------------------------------------------------------------------|----------------------------------|
| 75 | Hashemi, H., Mohammadi, H., & Abdollahzadeh, J. (2017). Symptoms and fungi associated with elm trees decline in Iran. <i>European Journal of Forest Research</i> , 136(5), 857-879.                                                                                                                        | Multiple insect/pathogen species |
| 76 | Hauer, R. J., Hanou, I. S., & Sivyer, D. (2020). Planning for active management of future invasive pests affecting urban forests: the ecological and economic effects of varying Dutch elm disease management practices for street trees in Milwaukee, WI USA. <i>Urban Ecosystems</i> , 23(5), 1005-1022. | Wrong topic                      |
| 77 | Hérard, F., & Maspero, M. (2019). History of discoveries and management of the citrus longhorned beetle, <i>Anoplophora chinensis</i> , in Europe. <i>Journal of pest science</i> , 92(1), 117-130.                                                                                                        | Literature Review                |
| 78 | Hoffman, C. M., Morgan, P., Mell, W., Parsons, R., Strand, E., & Cook, S. (2013). Surface fire intensity influences simulated crown fire behavior in lodgepole pine forests with recent mountain pine beetle-caused tree mortality. <i>Forest Science</i> , 59(4), 390-399.                                | Wrong setting                    |
| 79 | Hoffman, C., Morgan, P., Mell, W., Parsons, R., Strand, E. K., & Cook, S. (2012). Numerical simulation of crown fire hazard immediately after bark beetle-caused mortality in lodgepole pine forests. <i>Forest Science</i> , 58(2), 178-188.                                                              | Wrong setting                    |
| 80 | Holoborodko, K. K., Rusynov, V. I., Loza, I. M., & Pakhomov, O. Y. (2021). Adaptive features of the <i>Phyllonorycter robiniella</i> (Clemens, 1859) (Gracillariidae Stainton, 1854) population in urban ecosystems. <i>Ukrainian Journal of Ecology</i> , 11(2), 27-34.                                   | No specific impact               |
| 81 | Hong, C.H., Chen, J.Y., Zhao, Y. ... Zhang, X.Y. (2017). A correlation of pine wood nematode dispersal rate with human activities-a case study in the Three Gorges Reservoir Area. <i>Acta Ecologica Sinica</i> 37(20):6800-6808                                                                           | No full text in English          |
| 82 | Hong, Y., Tao, N., Qiang, C., & Li, C.P. (2016). Investigation on species of Limacodidae on <i>Prunus cerasifera</i> and sycamore in urban area of Wuhu City. <i>Chinese Journal of Schistosomiasis Control</i> , 28(6), 711-712.                                                                          | No full text in English          |
| 83 | Hood, G. R., Comerford, M., Weaver, A. K., Morton, P. M., & Egan, S. P. (2019). Human-mediated disturbance in multitrophic interactions results in outbreak levels of North America's most venomous caterpillar. <i>Biology Letters</i> , 15(9), 20190470.                                                 | Wrong topic                      |
| 84 | Horák, J., Holuša, J., Nováková, P., Lukášová, K., Loskotová, T., & Romportl, D. (2016). Agricultural landscapes with prevailing grasslands can mitigate the population densities of a tree-damaging alien species. <i>Agriculture, Ecosystems &amp; Environment</i> , 230, 177-183.                       | Wrong topic                      |
| 85 | Horner, R., Paterson, G., Walker, J. T., Perry, G. L., Jaksons, R., & Suckling, D. M. (2020). Will peri-urban <i>Cydia pomonella</i> (Lepidoptera: Tortricidae) challenge local eradication? <i>Insects</i> , 11(4), 207.                                                                                  | No specific impact               |
| 86 | Hubbes, M. (1999). The American elm and Dutch elm disease. <i>The Forestry Chronicle</i> , 75(2), 265-273.                                                                                                                                                                                                 | Literature Review                |
| 87 | Hulbert, J. M., Agne, M. C., Burgess, T. I., Roets, F., & Wingfield, M. J. (2017). Urban environments provide opportunities for early detections of <i>Phytophthora</i> invasions. <i>Biological Invasions</i> , 19(12), 3629-3644.                                                                        | Literature Review                |
| 88 | Inoue, T., & Shinkaji, N. (1989). Studies on the life history of the fleabeetle, <i>Argopistes coccinelliformis</i> Csiki (Coleoptera: Chrysomelidae). I. Feeding habits and seasonal development on various trees of oleaceae. <i>Japanese Journal of Applied Entomology and Zoology</i> , 33, 217-222.   | No full text in English          |
| 89 | Irzykowska, L., Werner, M., Bocianowski, J., Karolewski, Z., & Fruyska-Jówiak, D. (2013). Genetic variation of horse chestnut and red horse chestnut and trees susceptibility to <i>Erysiphe flexuosa</i> and <i>Cameraria ohridella</i> . <i>Biologia</i> , 68(5), 851-860.                               | Wrong topic                      |
| 90 | Ivanová, H., Bernadovicová, S., & Pastircáková, K. (2010). The influence of selected climatological characteristics on antracnose disease development in plane trees. <i>Ekológia</i> , 29(4), 430.                                                                                                        | No full text available           |
| 91 | Izón, G. M., Hand, M. S., Fontenla, M., & Berrens, R. P. (2010). The economic value of protecting inventoried roadless areas: a spatial hedonic price study in New Mexico. <i>Contemporary Economic Policy</i> , 28(4), 537-553.                                                                           | Wrong topic                      |
| 92 | Jacobi, W. R., Koski, R. D., & Negron, J. F. (2013). Dutch elm disease pathogen transmission by the banded elm bark beetle <i>Scolytus schevyrewi</i> . <i>Forest Pathology</i> , 43(3), 232-237.                                                                                                          | No specific impact               |
| 93 | Jin, A.X., Tian, C.M. & Zhao, P. (2006). Occurrence and control of urban forest biological disaster in China. <i>Forest Research</i> 19(5):653-659.                                                                                                                                                        | No full text in English          |

|     |                                                                                                                                                                                                                                                                                                                                                |                                           |
|-----|------------------------------------------------------------------------------------------------------------------------------------------------------------------------------------------------------------------------------------------------------------------------------------------------------------------------------------------------|-------------------------------------------|
| 94  | Jurc, M. (2012). The lime leafminer ( <i>Phyllonorycter issikii</i> ) in Slovenia. <i>Šumarski list</i> , 136(3-4), 119-127.                                                                                                                                                                                                                   | No full text in English                   |
| 95  | Jurskis, V. (2005). Eucalypt decline in Australia, and a general concept of tree decline and dieback. <i>Forest Ecology and Management</i> , 215(1-3), 1-20.                                                                                                                                                                                   | Literature Review                         |
| 96  | Just, M. G., Dale, A. G., & Frank, S. D. (2020). Gloomy scale (Hemiptera: Diaspididae) ecology and management on landscape trees. <i>Journal of Integrated Pest Management</i> , 11(1), 24.                                                                                                                                                    | Literature Review                         |
| 97  | Karamaouna, F., & Kontodimas, D. C. (2010). New threat from an insect borer in urban trees in Greece. <i>Hellenic Plant Protection Journal</i> , 3(1), 1-5.                                                                                                                                                                                    | Literature Review                         |
| 98  | Khdiar, M. Y., Barber, P. A., Hardy, G. E., Shaw, C., Steel, E. J., McMains, C., & Burgess, T. I. (2020). Association of phytophthora with declining vegetation in an urban forest environment. <i>Microorganisms</i> , 8(7), 973.                                                                                                             | Wrong topic                               |
| 99  | Khdiar, M. Y., Burgess, T. I., Scott, P. M., Barber, P. A., & Hardy, G. E. S. J. (2020). Pathogenicity of nineteen Phytophthora species to a range of common urban trees. <i>Australasian Plant Pathology</i> , 49(6), 619-630.                                                                                                                | Multiple insect/pathogen and tree species |
| 100 | Khorsandy, S., Nikbakht, A., Sabzalian, M. R., & Pessarakli, M. (2016). Effect of fungal endophytes on morphological characteristics, nutrients content and longevity of plane trees ( <i>Platanus orientalis</i> L.). <i>Journal of Plant Nutrition</i> , 39(8), 1156-1166.                                                                   | Wrong topic                               |
| 101 | Koch, F. H.; Yemshanov, D.; Colunga-Garcia, M.; Magarey, R. D.; Smith, W. D. (2011). Potential establishment of alien-invasive forest insect species in the United States: Where and how many? <i>Biological Invasions</i> 13(4):969-985                                                                                                       | Wrong setting                             |
| 102 | Koch, F. H.; Yemshanov, D.; Haack, R. A.; Magarey, R. D. (2014). Using a network model to assess risk of forest pest spread via recreational travel. <i>PLOS ONE</i> 2014;9(7):                                                                                                                                                                | Wrong topic                               |
| 103 | Koch, F. H.; Yemshanov, D.; Magarey, R. D.; Smith, W. D. (2012). Dispersal of invasive forest insects via recreational firewood: A quantitative analysis. <i>Journal of Economic Entomology</i> 105(2):438-450                                                                                                                                 | Wrong topic                               |
| 104 | Koski, R.; Jacobi, W. R. (2004). Tree pathogen survival in chipped wood mulch. <i>Journal of Arboriculture</i> 30(3):165-171                                                                                                                                                                                                                   | Wrong topic                               |
| 105 | Kovacs, K. F., Mercader, R. J., Haight, R. G., Siegert, N. W., McCullough, D. G., & Liebhold, A. M. (2011). The influence of satellite populations of emerald ash borer on projected economic costs in US communities, 2010–2020. <i>Journal of Environmental Management</i> , 92(9), 2170-2181.                                               | No clear urban/rural distinction          |
| 106 | Kranjec Orlovi?, J., Bulovec, I., Franjevi?, M., Franjevi?, D., Skejo, J., Biliškov, M., ... & Hrašovec, B. (2021). Preliminary results on narrow-leaved ash ( <i>Fraxinus angustifolia</i> Vahl) and green ash ( <i>Fraxinus pennsylvanica</i> Marshall) seed entomofauna in Croatia. <i>Šumarski list</i> , 145(3-4), 147-154.               | No full text in English                   |
| 107 | Krishnankutty, S. M., Bigsby, K., Hastings, J., Takeuchi, Y., Wu, Y., Lingafelter, S. W., ... & Ray, A. M. (2020). Predicting establishment potential of an invasive wood-boring beetle, <i>Trichoferus campestris</i> (Coleoptera: Cerambycidae) in the United States. <i>Annals of the Entomological Society of America</i> , 113(2), 88-99. | No clear urban/rural distinction          |
| 108 | Kruger, H. (2016). Designing local institutions for cooperative pest management to underpin market access: the case of industry-driven fruit fly area-wide management. <i>International Journal of the Commons</i> , 10(1).                                                                                                                    | Wrong topic                               |
| 109 | Kuate, J., Manga, B., Damesse, F., Kouodiekong, L., Ndindeng, S. A., David, O., & Parrot, L. (2006). Fruit trees cultivated in family farms in the humid zone of Cameroon: a survey. <i>FRUITS-PARIS</i> , 61(6), 373.                                                                                                                         | No full text in English                   |
| 110 | Laflamme, G. (2009). Earliest documented report of <i>Scleroderris</i> canker in North America: damage believed until now to be caused by summer frost. <i>Phytoprotection</i> , 90(3), 89-95.                                                                                                                                                 | Wrong setting                             |
| 111 | Langor, D. W., Cameron, E. K., MacQuarrie, C. J., McBeath, A., McClay, A., Peter, B., ... & Pohl, G. R. (2014). Non-native species in Canada's boreal zone: diversity, impacts, and risk. <i>Environmental Reviews</i> , 22(4), 372-420.                                                                                                       | Wrong topic                               |
| 112 | Lehmann, M. (1996). Leaf destroying pests at trees on avenues in the Land Brandenburg in the years 1993 to 1995. <i>Gesunde Pflanzen</i> , 48, 1, 20-27.                                                                                                                                                                                       | No full text available                    |
| 113 | Lesovoy, N., Fedorenko, V., Viger, S., Chumak, P., Kliuchevych, M., Strygun, O., ... & Vagaliuk, L. (2020). Biological, Trophological, Ecological and Control Features of Horse-Chestnut Leaf Miner ( <i>Cam?raria ohridella</i> Deschka & Dimic). <i>Ukrainian Journal of Ecology</i> , 10(3), 24-27.                                         | No full text in English                   |

|     |                                                                                                                                                                                                                                                                                                                           |                                  |
|-----|---------------------------------------------------------------------------------------------------------------------------------------------------------------------------------------------------------------------------------------------------------------------------------------------------------------------------|----------------------------------|
| 114 | Li, H. P., Wickham, J. D., Bushley, K., Wang, Z. G., Zhang, B., & Sun, J. H. (2020). New approaches in urban forestry to minimize invasive species impacts: The case of Xiongan new area in China. <i>Insects</i> , 11(5), 300.                                                                                           | Literature Review                |
| 115 | Li, J.; Sun, B.; Guo, Y.; Liu, J.; Chi, B.; Kong, F.; Liu, Y. (2020). Effects of different grass- growing patterns on the main pests and their natural enemies in pear orchards. <i>Journal of Fruit Science</i> , 37(10), 1545-1554                                                                                      | No full text in English          |
| 116 | Li, W. W., An, G. C., Guo, S. X., Zhao, Y. M., Zhou, C. G., Li, J. Q., & Yin, C. (2016). Ecological characteristics of <i>Shivaphis pteroceltis</i> (Hemiptera: Aphididae), a new pest on <i>Pteroceltis tatarinowii</i> . <i>Scientia Silvae Sinicae</i> , 52, 120-125.                                                  | Study not found                  |
| 117 | Liu, D.; Lin, W.; Xiong, D.; Niu, C.; Ye, X.; Tian, C. (2019). Mixed effects of landscape complexity and stand factors on cytospora canker of poplar across two different field soil conditions. <i>Journal of Beijing Forestry University</i> 2019;41(12):128-138.                                                       | No full text in English          |
| 118 | Liu, H., Luo, Y., Wen, J., Zhang, Z., Feng, J., & Tao, W. (2006). Pest risk assessment of <i>Dendroctonus valens</i> , <i>Hyphantria cunea</i> and <i>Apriona swainsoni</i> in Beijing. <i>Frontiers of Forestry in China</i> , 1(3), 328-335.                                                                            | No full text in English          |
| 119 | Lohr, V. I. (2013). Diversity in landscape plantings: Broader understanding and more teaching needed. <i>HortTechnology</i> 23(1):126-129                                                                                                                                                                                 | Wrong topic                      |
| 120 | Longo, S., & Rapisarda, C. (2014). Spread of <i>Paraleyrodes minei</i> I accarino (nesting whitefly) in Italian citrus groves. <i>EPPO Bulletin</i> , 44(3), 529-533.                                                                                                                                                     | No clear urban/rural distinction |
| 121 | Lopes, A., Barradas, C., Phillips, A. J. L., & Alves, A. (2016). Diversity and phylogeny of <i>Neofusicoccum</i> species occurring in forest and urban environments in Portugal. <i>Mycosphere</i> , 7, 906-920.                                                                                                          | No clear urban/rural distinction |
| 122 | Lorencetti, G. A. T., Potrich, M., Mazaro, S. M., Lozano, E. R., Gonçalves, T. E., & Dallacort, S. (2017). Spontaneous occurrence of <i>Beauveria bassiana</i> Vuill. 1912 (Ascomycetes: Clavicipitaceae) on <i>Thaumastocoris peregrinus</i> (Hemiptera: Thaumastocoridae). <i>Ciência Florestal</i> , 27(4), 1403-1407. | No full text in English          |
| 123 | Lovett, G. M., Weiss, M., Liebhold, A. M., Holmes, T. P., Leung, B., Lambert, K. F., ... & Weldy, T. (2016). Nonnative forest insects and pathogens in the United States: Impacts and policy options. <i>Ecological applications</i> , 26(5), 1437-1455.                                                                  | Literature Review                |
| 124 | Luchi, N., Ghelardini, L., Belbahri, L., Quartier, M., & Santini, A. (2013). Rapid detection of <i>Ceratocystis platani</i> inoculum by quantitative real-time PCR assay. <i>Applied and Environmental Microbiology</i> , 79(17), 5394-5404.                                                                              | No specific impact               |
| 125 | Luki, I., Zgrabli, Ž., & Mieti Stankovi, V. (2019). Presence of birch bark beetle ( <i>Scolytus ratzeburgi</i> ) in Croatia. <i>Šumarski list</i> , 143(11-12), 523-528.                                                                                                                                                  | No full text in English          |
| 126 | Lutinski, J. A.; Lutinski, C. J.; Mello Garcia, F. R. (2006). First record of <i>Glycaspis brimblecombei</i> Moore 1964, (Hemiptera: Psyllidae) in eucalyptus in Santa Catarina State, Brazil. <i>Ciencia Rural</i> 2006;36(2):653-655.                                                                                   | No full text in English          |
| 127 | Maceljski, M., & Balarin, I. (1974). Untersuchungen über einen neuen amerikanischen Schädling in Europa, die Platanen-Netzwanze, <i>Corythuca ciliata</i> (Say). <i>Anzeiger für Schädlingkunde, Pflanzen-und Umweltschutz</i> , 47(11), 165-170.                                                                         | Literature Review                |
| 128 | MacFarlane, D. W., & Meyer, S. P. (2005). Characteristics and distribution of potential ash tree hosts for emerald ash borer. <i>Forest Ecology and Management</i> , 213(1-3), 15-24.                                                                                                                                     | Literature Review                |
| 129 | Martínez, J. F. R., García, C. N. C., Viveros, A. L. M., Gutiérrez-Rojas, M., & Ruiz-Juárez, D. (2020). Insect Pests of Trees in a Park in Mexico City.                                                                                                                                                                   | No full text in English          |
| 130 | Marzano, M.; Ambrose-Oji, B.; Hall, C.; Moseley, D. (2020). Pests in the city: Managing public health risks and social values in response to oak processionary moth ( <i>Thaumetopoea processionea</i> ) in the United Kingdom. <i>Forests</i> 11(2).                                                                     | Wrong topic                      |
| 131 | Mason, C. J., Walsh, B., Keller, J., Couture, J. J., Calvin, D., & Urban, J. M. (2020). Fidelity and timing of spotted lanternfly (hemiptera: fulgoridae) attack patterns on ornamental trees in the suburban landscape. <i>Environmental entomology</i> , 49(6), 1427-1436.                                              | No specific impact               |
| 132 | Matoševi, D., & Pernek, M. (2011). Alien and invasive insects in Croatian forest Ecosystems and estimate of their damage. <i>Šumarski list</i> , 135(13), 264-270.                                                                                                                                                        | No full text in English          |

|     |                                                                                                                                                                                                                                                                                                                               |                                           |
|-----|-------------------------------------------------------------------------------------------------------------------------------------------------------------------------------------------------------------------------------------------------------------------------------------------------------------------------------|-------------------------------------------|
| 133 | McPherson, E. G.; Kotow, L. (2013). A municipal forest report card: Results for California, USA. <i>Urban Forestry and Urban Greening</i> 12(2):134-143                                                                                                                                                                       | Wrong topic                               |
| 134 | Meineke, E. K.; Dunn, R. R.; Frank, S. D. (2014). Early pest development and loss of biological control are associated with urban warming. <i>Biology Letters</i> 10(11).                                                                                                                                                     | Wrong topic                               |
| 135 | Meineke, E. K.; Dunn, R. R.; Sexton, J. O.; Frank, S. D. (2013). Urban Warming Drives Insect Pest Abundance on Street Trees. <i>PLOS ONE</i> 8(3).                                                                                                                                                                            | Wrong topic                               |
| 136 | Melzer, T., Breuhahn, M., Rybak, M., & Doobe, G. (2019). Differential diagnosis of the pathogens <i>Pseudomonas syringae</i> pv. <i>aesculi</i> and <i>Phytophthora</i> spp. at <i>Aesculus</i> spp. in the urban area of Hamburg. <i>Journal für Kulturpflanzen</i> , 71(10), 253-263.                                       | No full text in English                   |
| 137 | Meng, P. S., Hoover, K., & Keena, M. A. (2015). Asian longhorned beetle (Coleoptera: Cerambycidae), an introduced pest of maple and other hardwood trees in North America and Europe. <i>Journal of Integrated Pest Management</i> , 6(1).                                                                                    | Literature Review                         |
| 138 | Meyer, S., Rusterholz, H. P., & Baur, B. (2020). Urbanisation and forest size affect the infestation rates of plant-galling arthropods and damage by herbivorous insects. <i>European Journal of Entomology</i> , 117, 34-48.                                                                                                 | Wrong topic                               |
| 139 | Migliorini, D.; Khdiar, M. Y.; Padrón, C. R.; Vivas, M.; Barber, P. A.; Hardy, G. E. S. J.; Burgess, T. I. (2019). Extending the host range of <i>Phytophthora multivora</i> , a pathogen of woody plants in horticulture, nurseries, urban environments and natural ecosystems. <i>Urban Forestry and Urban Greening</i> 46. | Wrong topic                               |
| 140 | Milonas, P. G., & Partsinevelos, G. K. (2014). First record of <i>Glycaspis brimblecombei</i> Moore, 1964 (Hemiptera: Psyllidae) in Greece. <i>Hellenic Plant Protection Journal</i> , 7(1), 19-23.                                                                                                                           | No full text in English                   |
| 141 | Mingaleva, N. A., Pestov, S. V., & Zagirova, S. V. (2011). Health status and biological damage to tree leaves in green areas of Syktyvkar. <i>Contemporary Problems of Ecology</i> , 4(3), 310-318.                                                                                                                           | Multiple insect/pathogen and tree species |
| 142 | Mirchev, P., Georgiev, G., & Tsankov, G. (2017). Long-term studies on egg parasitoids of pine processionary moth ( <i>Thaumetopoea pityocampa</i> ) in a new locality in Bulgaria. <i>Journal of the Entomological Research Society</i> , 19(3), 15-25.                                                                       | Wrong topic                               |
| 143 | Montalva, C., Rojas, E., Ruiz, C., & Lanfranco, D. (2010). The cypress aphid in Chile: A review of the current situation and preliminary data of the biological control. <i>Bosque</i> , 31(2), 81-88.                                                                                                                        | Literature Review                         |
| 144 | Moore, G. M.; Lefoe, G. (2020). The effect of a heat wave on urban tree pests in Melbourne, australia: Examples that may inform climate change tree management. <i>Arboriculture and Urban Forestry</i> 46(2):135-147                                                                                                         | Wrong topic                               |
| 145 | Morin, R. S., Liebhold, A. M., Pugh, S. A., & Crocker, S. J. (2017). Regional assessment of emerald ash borer, <i>Agrilus planipennis</i> , impacts in forests of the Eastern United States. <i>Biological Invasions</i> , 19(2), 703-711.                                                                                    | No clear urban/rural distinction          |
| 146 | Murace, M., Luna, M. L., Ciuffani, M. G., & Perello, A. (2017). THE ANATOMICAL AND CHEMICAL MODIFICATIONS IN THE WOOD OF SPECIMENS OF TREES OF LA PLATA CITY (BUENOS AIRES) CAUSED BY LAETIPORUS SULPHUREUS (BASIDIOMYCOTA, POLYPORALES). <i>BOLETIN DE LA SOCIEDAD ARGENTINA DE BOTANICA</i> , 52(4), 647-661.               | No full text in English                   |
| 147 | Musolin, D. L., Selikhovkin, A. V., Shabunin, D. A., Zviagintsev, V. B., & Baranchikov, Y. N. (2017). Between ash dieback and emerald ash borer: two Asian invaders in Russia and the future of ash in Europe. <i>Baltic Forestry</i> , 23(1), 316-333.                                                                       | Literature Review                         |
| 148 | Mutun, S. (2009). <i>Corythucha ciliata</i> , a new <i>Platanus</i> pest in Turkey. <i>Phytoparasitica</i> , 37(1), 65-66.                                                                                                                                                                                                    | Literature Review                         |
| 149 | Nadel, R. L., & Noack, A. E. (2012). Current understanding of the biology of <i>Thaumastocoris peregrinus</i> in the quest for a management strategy. <i>International Journal of Pest Management</i> , 58(3), 257-266.                                                                                                       | Literature Review                         |
| 150 | Nakamura, K., Akiba, M., & Kanetani, S. (2001). Pine wilt disease as promising causal agent of the mass mortality of <i>Pinus armandii</i> Franch. var. <i>amamiana</i> (Koidz.) Hatusima in the field. <i>Ecological Research</i> , 16(4), 795-801.                                                                          | No clear urban/rural distinction          |
| 151 | Naoe, S. & Ikeda, T. (2011). Hazard Map for Pine Wilt Disease in Kyoto City. <i>Journal of the Japanese Forest Society</i> . 93 (1), 33-36.                                                                                                                                                                                   | No full text in English                   |
| 152 | Náplavová, K., & Gáper, J. (2016). Bioindication value of tar spot on maple trees in industrial areas: the case of Ostrava region, the Czech Republic.                                                                                                                                                                        | No specific impact                        |



|     |                                                                                                                                                                                                                                                                                                                           |                         |
|-----|---------------------------------------------------------------------------------------------------------------------------------------------------------------------------------------------------------------------------------------------------------------------------------------------------------------------------|-------------------------|
| 153 | Neacsu, I., & Rosca, I. (2015). RESEARCH ON PEST EVOLUTION TO PLATANUS SPP. FROM NURSERIES. <i>Scientific Papers-Series A, Agronomy</i> , 58, 254-259.                                                                                                                                                                    | Wrong setting           |
| 154 | Neto, A. J. D., Trevisan, H., Nascimento, L. S. D., & Carvalho, A. G. D. (2011). Description of damages and volume of wood phytomass of <i>Cassia siamea</i> lam stems cut for <i>Coccoderus novempunctatus</i> (coleoptera: cerambycidae). <i>Revista Árvore</i> , 35, 801-807.                                          | Wrong setting           |
| 156 | O'Donnell, K., Libeskind-Hadas, R., Hulcr, J., Bateman, C., Kasson, M. T., Ploetz, R. C., ... & Rooney, A. P. (2016). Invasive Asian <i>Fusarium</i> – <i>Euwallacea</i> ambrosia beetle mutualists pose a serious threat to forests, urban landscapes and the avocado industry. <i>Phytoparasitica</i> , 44(4), 435-442. | Literature Review       |
| 157 | Oberemok, V. V., Laikova, K. V., Shumskykh, M. N., & Zaitsev, A. S. (2017). The first record of box tree moth in Crimea and a novel perspective of its biological control based on <i>Lymantria dispar</i> multicapsid nuclear polyhedrosis virus and DNA insecticides approach. <i>Entomologia Generalis</i> , 207-217.  | No full text available  |
| 158 | O'Callaghan, A. M. & Skelly, J. (2013). Community involvement to reduce insect threats to urban forests. <i>Journal of Extension</i> , 51(6).                                                                                                                                                                             | Wrong topic             |
| 159 | Ocampo Florez, V., Duran Prieto, J., Albornoz, M., & Forero, D. (2018). New plant associations for <i>Monalonion velezangeli</i> (Hemiptera: Miridae) in green urban areas of Bogotá (Colombia). <i>Acta Biológica Colombiana</i> , 23(2), 205-208.                                                                       | No full text in English |
| 160 | Oehlschlager, A. C. (2016). Palm weevil pheromones–discovery and use. <i>Journal of chemical ecology</i> , 42(7), 617-630.                                                                                                                                                                                                | Literature Review       |
| 161 | Oleksyn, J., Kloppel, B. D., Lukasiwicz, S., Karolewski, P., & Reich, P. B. (2007). Ecophysiology of horse chestnut ( <i>Aesculus hippocastanum</i> L.) in degraded and restored urban sites. <i>Polish Journal of Ecology</i> , Vol. 55 (2): 245-260.                                                                    | Wrong topic             |
| 162 | Orlova-Bienkowskaja, M. J.; Biełkowski, A. O. (2018). Modeling long-distance dispersal of emerald ash borer in European Russia and prognosis of spread of this pest to neighboring countries within next 5 years. <i>Ecology and Evolution</i> 8(18):9295-9304.                                                           | Wrong topic             |
| 163 | Ortiz, A. G.; Peres-Filho, O.; da Silva Junior, J. G.; de Souza, M. D.; Dorval, A. (2017). Record of <i>Leptocybe invasa</i> fisher & la salle (Hymenoptera: Eulophidae) in eucalyptus in the Mato Grosso state, Brazil. <i>Revista Espacios</i> 2017;38(28).                                                             | No full text in English |
| 164 | Ospanova, A., Anuarova, L., Spanbayev, A., Sharipova, A., Gabdulkhayeva, B., Zhumabekova, B., ... & Bairmurat, K. (2018). Fungal pathogens of shrubs in industrial cities. <i>Journal of Plant Diseases and Protection</i> , 125(1), 83-88.                                                                               | Wrong topic             |
| 165 | Ouellette, G. B. & Pronovost, R. (1998). Growth anomalies on linden trees related to their decline in Quebec: needs to apply preventive measures in the early life of trees. <i>Phytoprotection</i> .                                                                                                                     | No full text in English |
| 166 | Ozino, O. I. & Zeppa, G. (1988). Effect of entomopathogenic fungus inoculum on the control of <i>Corythucha ciliata</i> Say adults, wintering on plane trees of city groves. <i>Giornale di batteriologia, virologia ed immunologia</i> , 81(1-12), 32-39.                                                                | Wrong topic             |
| 167 | Paap, T., Burgess, T. I., & Wingfield, M. J. (2017). Urban trees: bridge-heads for forest pest invasions and sentinels for early detection. <i>Biological invasions</i> , 19(12), 3515-3526.                                                                                                                              | Literature Review       |
| 168 | Paja Živkovi, I., Skendži, S., & LEMI, D. (2021). Rapid spread and first massive occurrence of <i>Halyomorpha halys</i> (Stål, 1855) in agricultural production in Croatia. <i>Journal of Central European Agriculture</i> , 22(3), 531-538.                                                                              | Wrong topic             |
| 169 | Pajovi, I.; Petri, D.; Bellini, R.; Pajovi, L.; Quarrie, S. (2017). First record of <i>Anoplophora glabripennis</i> (Coleoptera: Cerambycidae) in Montenegro. <i>Baltic Forestry</i> 23(3):706-710                                                                                                                        | Wrong topic             |
| 170 | Palmer, S., Martin, D., DeLauer, V. & Rogan, J. (2014). Vulnerability and adaptive capacity in response to the Asian longhorned beetle infestation in Worcester, Massachusetts. <i>Human Ecology</i> , 42(6), 965-977.                                                                                                    | No specific impact      |
| 171 | Paquette, A.; Sousa-Silva, R.; Maure, F.; Cameron, E.; Belluau, M.; Messier, C. (2021). Praise for diversity: A functional approach to reduce risks in urban forests. <i>Urban Forestry and Urban Greening</i> 62.                                                                                                        | Wrong topic             |
| 172 | Park, K. H., Oh, S. Y., Park, M. S., Kim, M. S., Klopfenstein, N. B., Kim, N. K., ... & Lim, Y. W. (2018). Re-evaluation of <i>Armillaria</i> and <i>Desarmillaria</i> in South Korea based on ITS/tef1 sequences and morphological characteristics. <i>Forest Pathology</i> , 48(6), e12447.                             | Wrong topic             |

|     |                                                                                                                                                                                                                                                                                                 |                                           |
|-----|-------------------------------------------------------------------------------------------------------------------------------------------------------------------------------------------------------------------------------------------------------------------------------------------------|-------------------------------------------|
| 173 | Parker, B. L., Skinner, M., Gouli, S., Ashikaga, T., & Teillon, H. B. (1998). Survival of hemlock woolly adelgid (Homoptera: Adelgidae) at low temperatures. <i>Forest Science</i> , 44(3), 414-420.                                                                                            | Wrong setting                             |
| 174 | Parker, K., Ryall, K., Aukema, B. H., & Silk, P. (2020). Early detection of <i>Agrilus planipennis</i> : investigations into the attractive range of the sex pheromone (3Z)-lactone. <i>Entomologia Experimentalis et Applicata</i> , 168(2), 166-173.                                          | Wrong topic                               |
| 175 | Pastircáková, K., Ivanová, H., & Pastircák, M. (2018). Species diversity of fungi on damaged branches and leaves of ashes (spp.) in different types of stands in Slovakia. <i>Central European Forestry Journal</i> , 64(2), 133-139.                                                           | Multiple insect/pathogen and tree species |
| 176 | Paulin, M., Hirka, A., Eötvös, C. B., Gáspár, C., Fürjes-Mikó, Á., & Csóka, G. (2020). Known and predicted impacts of the invasive oak lace bug () in European oak ecosystems—a review. <i>Folia Oecologica</i> , 47(2), 131-139.                                                               | Literature Review                         |
| 177 | Payette, S., Fortin, M. J., & Morneau, C. (1996). The recent sugar maple decline in southern Quebec: probable causes deduced from tree rings. <i>Canadian Journal of Forest Research</i> , 26(6), 1069-1078.                                                                                    | Wrong setting                             |
| 178 | Pei, J., Li, C., Ren, L., & Zong, S. (2020). Factors influencing cold hardiness during overwintering of <i>Streltzoviella insularis</i> (Lepidoptera: Cossidae). <i>Journal of Economic Entomology</i> , 113(3), 1254-1261.                                                                     | No specific impact                        |
| 179 | Perfecto, I., & Vandermeer, J. (2006). The effect of an ant-hemipteran mutualism on the coffee berry borer ( <i>Hypothenemus hampei</i> ) in southern Mexico. <i>Agriculture, Ecosystems &amp; Environment</i> , 117(2-3), 218-221.                                                             | Wrong setting                             |
| 180 | Peters, F. S., Holweg, C. L., Rigling, D., & Metzler, B. (2012). Chestnut blight in south-western Germany: multiple introductions of <i>Cryphonectria parasitica</i> and slow hypovirus spread. <i>Forest Pathology</i> , 42(5), 397-404.                                                       | No specific impact                        |
| 181 | Pinto, M. A. D. S., Gonçalves, A. P. S., Santos, S. A. P., Almeida, M. R. L. D., & Azevedo, J. C. M. D. (2014). Biological invasion of <i>Corythucha ciliata</i> in green urban spaces in Portugal: a niche modeling approach using maximum entropy. <i>Ciência Florestal</i> , 24(3), 597-607. | No full text in English                   |
| 182 | Pires, C. S., & Price, P. W. (2000). Patterns of host plant growth and attack and establishment of gall-inducing wasp (Hymenoptera: Cynipidae). <i>Environmental Entomology</i> , 29(1), 49-54.                                                                                                 | No specific impact                        |
| 183 | Poland, T. M., & McCullough, D. G. (2006). Emerald ash borer: invasion of the urban forest and the threat to North America's ash resource. <i>Journal of Forestry</i> , 104(3), 118-124.                                                                                                        | Literature Review                         |
| 184 | Polyakova, G.G. & Senashova, V.A. (2017). Influence of the Fungus <i>melampsorella caryophyllacearum</i> on dynamics of carbohydrates and secondary compounds in Siberian fir. <i>Mikologiya I Fitopatologiya</i> 51(3):168-177                                                                 | No full text in English                   |
| 185 | Pontius, J., Hanavan, R.P., Hallett, R.A., Cook, B.D., & Corp, L.A. (2017). High spatial resolution spectral unmixing for mapping ash species across a complex urban environment. <i>Remote Sensing of Environment</i> , 199, 360-369.                                                          | Wrong topic                               |
| 186 | Poyet, M., Le Roux, V., Gibert, P., Meirland, A., Prévost, G., Eslin, P., & Chabrerie, O. (2015). The Wide Potential Trophic Niche of the Asiatic Fruit Fly <i>Drosophila suzukii</i> : The Key of Its Invasion Success in Temperate Europe? <i>PLoS ONE</i> , 10.                              | Wrong topic                               |
| 187 | Price, J. I., McCollum, D. W., & Berrens, R. P. (2010). Insect infestation and residential property values: A hedonic analysis of the mountain pine beetle epidemic. <i>Forest Policy and Economics</i> , 12(6), 415-422.                                                                       | No clear urban/rural distinction          |
| 188 | Priscilla Brebi, M., Aguilera, A., Ojeda, N., & Rebolledo, R. (2011). Nuevos registros de insectos fitófagos asociados a canelo ( <i>Drimys winteri</i> Forst.) en La Araucanía. <i>Idesia (Arica)</i> , 29(2), 99-104.                                                                         | No full text in English                   |
| 189 | Ramírez-Restrepo, L., & Halffter, G. (2016). Copro-necrophagous beetles (Coleoptera: Scarabaeinae) in urban areas: A global review. <i>Urban ecosystems</i> , 19(3), 1179-1195.                                                                                                                 | Literature Review                         |
| 190 | Ramsfield, T. D. (2016). Evolving symbioses between insects and fungi that kill trees in Canada: new threats associated with invasive organisms. <i>The Canadian Entomologist</i> , 148(S1), S160-S169.                                                                                         | Literature Review                         |
| 191 | Randolph, K. C., Rose, A. K., Oswald, C. M., & Brown, M. J. (2013). Status of black walnut ( <i>Juglans nigra</i> L.) in the eastern United States in light of the discovery of thousand cankers disease. <i>Castanea</i> , 78(1), 2-14.                                                        | No clear urban/rural distinction          |

|     |                                                                                                                                                                                                                                                                                                                                                                       |                                  |
|-----|-----------------------------------------------------------------------------------------------------------------------------------------------------------------------------------------------------------------------------------------------------------------------------------------------------------------------------------------------------------------------|----------------------------------|
| 192 | Rapisarda, C., & Longo, S. (2021). First report from Sicily (Italy) of the orange spiny whitefly, <i>Aleurocanthus spiniferus</i> (Quaintance) (Hemiptera: Aleyrodidae), and its potential risk for the Italian citrus industry. <i>EPPO Bulletin</i> , 51(2), 329-332.                                                                                               | Wrong topic                      |
| 193 | Redondo, M. A.; Boberg, J.; Stenlid, J.; Oliva, J. (2018). Functional traits associated with the establishment of introduced <i>Phytophthora</i> spp. in Swedish forests. <i>Journal of Applied Ecology</i> 55(3):1538-1552                                                                                                                                           | Wrong topic                      |
| 194 | Reynolds, H. L., Brandt, L., Fischer, B. C., Hardiman, B. S., Moxley, D. J., Sandweiss, E., ... & Fei, S. (2020). Implications of climate change for managing urban green infrastructure: an Indiana, US case study. <i>Climatic Change</i> , 163(4), 1967-1984.                                                                                                      | Literature Review                |
| 195 | Sadof, C. S., Hughes, G. P., Witte, A. R., Peterson, D. J., & Ginzler, M. D. (2017). Tools for staging and managing emerald ash borer in the urban forest. <i>Arboric. Urban For</i> , 43, 15-26.                                                                                                                                                                     | Wrong topic                      |
| 196 | Schowalter, T. D., & Ring, D. R. (2017). Biology and Management of the Buck Moth, <i>Hemileuca maia</i> (Lepidoptera: Saturniidae). <i>Journal of Integrated Pest Management</i> , 8(1), 4.                                                                                                                                                                           | Literature Review                |
| 197 | Schowalter, T. D., & Ring, D. R. (2017). Biology and management of the fall webworm, <i>Hyphantria cunea</i> (Lepidoptera: Erebidae). <i>Journal of Integrated Pest Management</i> , 8(1).                                                                                                                                                                            | Literature Review                |
| 198 | Schröder, T. & Richter E. (2003). The horse chesnut scale insect <i>Pulvinaria regalis</i> CANARD, 1968 (Homoptera, Coccidae) - A new pest on urban trees in Braunschweig, Lower Saxony, Germany. <i>Braunschweiger Naturkundliche Schriften</i> 6(4):803-812                                                                                                         | No full text in English          |
| 199 | Schumacher, J. (2011). The general situation regarding ash dieback in Germany and investigations concerning the invasion and distribution strategies of <i>Chalara fraxinea</i> in woody tissue 1. <i>EPPO Bulletin</i> , 41(1), 7-10.                                                                                                                                | Literature Review                |
| 200 | Selikhovkin, A. V., Drenkhan, R., Mandelshtam, M. Y., & Musolin, D. L. (2020). Invasions of insect pests and fungal pathogens of woody plants into the northwestern part of European Russia.                                                                                                                                                                          | No full text in English          |
| 201 | Selikhovkin, A. V., Popovichev, B. G., Mandelshtam, M. Y., Vasaitis, R., & Musolin, D. L. (2017). The frontline of invasion: the current northern limit of the invasive range of Emerald ash borer, <i>Agrilus planipennis</i> Fairmaire (Coleoptera: Buprestidae). <i>Baltic Forestry</i> , 23(1), 309-315.                                                          | No clear urban/rural distinction |
| 202 | Sellenschlo, U. (1988). Termiten in Hamburg. <i>Anzeiger für Schädlingkunde, Pflanzenschutz, Umweltschutz</i> , 61(6), 105-108.                                                                                                                                                                                                                                       | No full text in English          |
| 203 | Seybold, S. J., Klingeman III, W. E., Hishinuma, S. M., Coleman, T. W., & Graves, A. D. (2019). Status and impact of walnut twig beetle in urban forest, orchard, and native forest ecosystems. <i>Journal of Forestry</i> , 117(2), 152-163.                                                                                                                         | Literature Review                |
| 204 | Shatz, A. J., Rogan, J., Sangermano, F., Ogneva-Himmelberger, Y., & Chen, H. (2013). Characterizing the potential distribution of the invasive Asian longhorned beetle ( <i>Anoplophora glabripennis</i> ) in Worcester County, Massachusetts. <i>Applied Geography</i> , 45, 259-268.                                                                                | No specific impact               |
| 205 | Sherald, J. L. (2007). Bacterial leaf scorch of landscape trees: what we know and what we do not know. <i>Arboriculture and Urban Forestry</i> , 33(6), 376.                                                                                                                                                                                                          | Literature Review                |
| 206 | Shogren, C., & Paine, T. D. (2016). Economic Benefit for Cuban Laurel Thrips Biological Control. <i>Journal of Economic Entomology</i> , 109(1), 93-99.                                                                                                                                                                                                               | Wrong topic                      |
| 207 | Shu, J.P. & Pan, Y. Z. (2006). Study on cone life table of <i>Pinus armandii</i> . <i>Forest Research</i> 19(6):729-733                                                                                                                                                                                                                                               | No full text in English          |
| 208 | Shupranova, L. V., Holoborodko, K. K., Seliutina, O. V., & Pakhomov, O. Y. (2019). The influence of <i>Cameraria ohridella</i> (Lepidoptera, Gracillariidae) on the activity of the enzymatic antioxidant system of protection of the assimilating organs of <i>Aesculus hippocastanum</i> in an urbogenic environment. <i>Biosystems Diversity</i> , 27(3), 238-243. | No full text in English          |
| 209 | Shvydenko, I. M., Stankevych, S. V., Zabrodina, I. V., Bulat, A. G., Pozniakova, S. I., Goroshko, V. V., ... & Matsyura, A. V. (2021). Diversity and distribution of leaf mining insects in deciduous tree plantations. A review. <i>Ukrainian Journal of Ecology</i> , 11(1), 399-408.                                                                               | Literature Review                |
| 210 | Siegert, N. W., Mercader, R. J., & McCullough, D. G. (2015). Spread and dispersal of emerald ash borer (Coleoptera: Buprestidae): estimating the spatial dynamics of a difficult-to-detect invasive forest pest. <i>The Canadian Entomologist</i> , 147(3), 338-348.                                                                                                  | Literature Review                |
| 211 | Silva-Castaño, A. F., Wilson, M. R., Brochero, H. L., & Franco-Lara, L. (2020). Biodiversity, bugs, and barcodes: the Cicadellidae associated with grassland and phytoplasmas in the Sabana de Bogotá, Colombia. <i>Florida Entomologist</i> , 102(4), 755-762.                                                                                                       | No specific impact               |

|     |                                                                                                                                                                                                                                                                                                                                                 |                                           |
|-----|-------------------------------------------------------------------------------------------------------------------------------------------------------------------------------------------------------------------------------------------------------------------------------------------------------------------------------------------------|-------------------------------------------|
| 212 | Sjöman, H., Östberg, J., & Nilsson, J. (2014). Review of host trees for the wood-boring pests <i>Anoplophora glabripennis</i> and <i>Anoplophora chinensis</i> : an urban forest perspective. <i>Arboriculture &amp; Urban Forestry</i> , 40(3), 143-164.                                                                                       | Literature Review                         |
| 213 | Sjöman, H.; Östberg, J. (2019). Vulnerability of ten major Nordic cities to potential tree losses caused by longhorned beetles. <i>Urban Ecosystems</i> ;22(2):385-395.                                                                                                                                                                         | Wrong topic                               |
| 214 | Snieškiene, V., Baležentiene, L., & Stankeviene, A. (2016). Urban salt contamination impact on tree health and the prevalence of fungi agent in cities of the central Lithuania. <i>Urban forestry &amp; urban greening</i> , 19, 13-19.                                                                                                        | Multiple insect/pathogen and tree species |
| 215 | Solano, A., Rodriguez, S. L., Greenwood, L., Dodds, K. J., & Coyle, D. R. (2021). Firewood transport as a vector of forest pest dispersal in North America: a scoping review. <i>Journal of Economic Entomology</i> , 114(1), 14-23.                                                                                                            | Literature Review                         |
| 216 | Song, J., Luo, Y., Shi, J., Yan, X., Chen, W., & Jiang, P. (2006). Niche of insect borers within <i>Pinus massoniana</i> infected by pine wood nematode. <i>Frontiers of Forestry in China</i> , 1(4), 460-463.                                                                                                                                 | No full text in English                   |
| 217 | Stilwell, A. R., Smith, S. M., Cognato, A. I., Martinez, M., & Flowers, R. W. (2014). <i>Coptoborus ochromactonus</i> , n. sp. (Coleoptera: Curculionidae: Scolytinae), an emerging pest of cultivated balsa (Malvales: Malvaceae) in Ecuador. <i>Journal of Economic Entomology</i> , 107(2), 675-683.                                         | Wrong setting                             |
| 218 | Straw, N. A., & Bellett-Travers, M. (2004). Impact and management of the horse chestnut leaf-miner ( <i>Cameraria ohridella</i> ). <i>Arboricultural Journal</i> , 28(1-2), 67-83.                                                                                                                                                              | Literature Review                         |
| 219 | Sturrock, R. N. (2012). Climate change and forest diseases: using today's knowledge to address future challenges. <i>Forest Systems</i> , 21(2), 329-336.                                                                                                                                                                                       | Literature Review                         |
| 220 | Sutherland, R., Soewarto, J., Beresford, R., & Ganley, B. (2020). Monitoring <i>Austropuccinia psidii</i> (myrtle rust) on New Zealand Myrtaceae in native forest. <i>New Zealand Journal of Ecology</i> , 44(2), 1-5.                                                                                                                          | Wrong setting                             |
| 221 | Sydnor, T. D., Bumgardner, M., & Todd, A. (2007). The potential economic impacts of emerald ash borer ( <i>Agrilus planipennis</i> ) on Ohio, US, communities. <i>Arboriculture &amp; Urban Forestry</i> . 33 (1): 48? 54., 33(1).                                                                                                              | No clear urban/rural distinction          |
| 222 | Szczepaniec, A.; Creary, S. F.; Laskowski, K. L.; Nyrop, J. P.; Raupp, M. J. (2011). Neonicotinoid insecticide imidacloprid causes outbreaks of spider mites on elm trees in urban landscapes. <i>PLOS ONE</i> 6(5).                                                                                                                            | Wrong topic                               |
| 223 | Takahashi, M., Itoya, Y., Mukouda, M., & Nishimura, K. (1998). Provenance differences of hiba ( <i>Thujopsis dolabrata</i> ) against resinous stem canker disease and spatial distribution of damage (disease severity) in a provenance test. <i>JOURNAL OF THE JAPANESE FORESTRY SOCIETY</i> , 80(3), 176-183.                                 | No full text in English                   |
| 224 | Tomlinson, I., Potter, C., & Bayliss, H. (2015). Managing tree pests and diseases in urban settings: the case of Oak Processionary Moth in London, 2006–2012. <i>Urban Forestry &amp; Urban Greening</i> , 14(2), 286-292.                                                                                                                      | Wrong topic                               |
| 225 | Tomoshevich, M., Kirichenko, N., Holmes, K., & Kenis, M. (2013). Foliar fungal pathogens of European woody plants in Siberia: an early warning of potential threats? <i>Forest pathology</i> , 43(5), 345-359.                                                                                                                                  | Multiple insect/pathogen and tree species |
| 226 | Tsopeles, P., Santini, A., Wingfield, M. J., & Wilhelm de Beer, Z. (2017). Canker stain: a lethal disease destroying iconic plane trees. <i>Plant Disease</i> , 101(5), 645-658.                                                                                                                                                                | Literature Review                         |
| 227 | Tubby, K. V., & Pérez-Sierra, A. (2015). Pests and pathogen threats to plane ( <i>Platanus</i> ) in Britain. <i>Arboricultural Journal</i> , 37(2), 85-98.                                                                                                                                                                                      | Literature Review                         |
| 228 | Tubby, K. V., & Webber, J. F. (2010). Pests and diseases threatening urban trees under a changing climate. <i>Forestry: An International Journal of Forest Research</i> , 83(4), 451-459.                                                                                                                                                       | Literature Review                         |
| 229 | Turaliyeva, M., Yeshibaev, A., Saparbekova, A., Akynova, L., Abildayeva, R., Sadenova, M., ... & Digel, I. (2016). Species composition and injuriousness of stranger xylophilous fauna affecting indigenous urban dendroflora of Central Asia. <i>Asian Journal of Microbiology, Biotechnology and Environmental Sciences</i> , 18(2), 359-366. | Multiple insect/pathogen and tree species |
| 230 | Turner, J. A., Bulman, L. S., Richardson, B., & Moore, J. R. (2004). COST-BENEFIT ANALYSIS OF BIOSECURITY AND FOREST HEALTH RESEARCH. <i>New Zealand Journal of Forestry Science</i> , 34(3), 324-343.                                                                                                                                          | No clear urban/rural distinction          |
| 231 | Valenta, V.; Gilioli, G.; Schrader, G. (2017). Environmental risk analysis for the emerald ash borer <i>Agrilus planipennis</i> fairmare for Europe. <i>Journal fur Kulturpflanzen</i> 69(1):1-9                                                                                                                                                | No full text in English                   |

|     |                                                                                                                                                                                                                                                                                                         |                                           |
|-----|---------------------------------------------------------------------------------------------------------------------------------------------------------------------------------------------------------------------------------------------------------------------------------------------------------|-------------------------------------------|
| 232 | Vallejos-Barra, O., Paiva, C. V., Ponce-Donoso, M., & Álvarez, M. M. (2019). Detection of <i>Oryctomorpha bimaculatus</i> (Coleoptera: Scarabaeidae: Rutelinae) in <i>Platanus orientalis</i> , Talca, Chile. <i>Revista Colombiana de Entomología</i> , 45(1).                                         | No full text in English                   |
| 233 | Vanden Broeck, A.; Cox, K.; Melosik, I.; Maes, B.; Smets, K. (2018). Genetic diversity loss and homogenization in urban trees: the case of <i>Tilia × europaea</i> in Belgium and the Netherlands. <i>Biodiversity and Conservation</i> 2018;27(14):3777-3792.                                          | Wrong topic                               |
| 234 | Vander Vecht, J.; Conway, T. M. (2015). Comparing species composition and planting trends: Exploring pest vulnerability in Toronto's urban forest. <i>Arboriculture and Urban Forestry</i> 41(1):26-40                                                                                                  | Wrong topic                               |
| 235 | Vasquez, J., Delgado, C., Couturier, G., Mejia, K., Freitas, L., & Del Castillo, D. (2008). Pest insects of the palm tree <i>Mauritia flexuosa</i> Lf, dwarf form, in Peruvian Amazonia. <i>Fruits</i> , 63(4), 227-238.                                                                                | No clear urban/rural distinction          |
| 236 | Véle, A., & Horák, J. (2018). The importance of host characteristics and canopy openness for pest management in urban forests. <i>Urban Forestry &amp; Urban Greening</i> , 36, 84-89.                                                                                                                  | No specific impact                        |
| 237 | Veselkin, D. V., Kuyantseva, N. B., Chashchina, O. E., Mumber, A. G., Zamshina, G. A., & Molchanova, D. A. (2019). Levels of leaf damage by phyllophages in invasive <i>Acer negundo</i> and Native <i>Betula pendula</i> and <i>Salix caprea</i> . <i>Russian Journal of Ecology</i> , 50(6), 511-516. | Multiple insect/pathogen and tree species |
| 238 | Vétek, G., & Rédei, D. (2009). First record of <i>Acizzia jamatonica</i> (Kuwayama)(Hemiptera: Psyllidae) in Bulgaria. <i>Acta zoologica bulgarica</i> , 61(3), 323-325.                                                                                                                                | Literature Review                         |
| 239 | Vreulink, J. M., Khayhan, K., Hagen, F., Botes, A., Moller, L., Boekhout, T., ... & Botha, A. (2017). Presence of pathogenic cryptococci on trees situated in two recreational areas in South Africa. <i>Fungal Ecology</i> , 30, 101-111.                                                              | No specific impact                        |
| 240 | Wang, B., Tian, C., & Sun, J. (2019). Effects of landscape complexity and stand factors on arthropod communities in poplar forests. <i>Ecology and Evolution</i> , 9, 7143 - 7156.                                                                                                                      | Wrong setting                             |
| 241 | Wichuk, K. M.; McCartney, D.; Bansal, V. K.; Tewari, J. P. (2011). Composting Effect on Three Fungal Pathogens Affecting Elm Trees in Edmonton, Alberta. <i>Compost Science and Utilization</i> 19(3):152-162.                                                                                          | Wrong topic                               |
| 242 | Wikler, K., Storer, A. J., Newman, W., Gordon, T. R., & Wood, D. L. (2003). The dynamics of an introduced pathogen in a native Monterey pine ( <i>Pinus radiata</i> ) forest. <i>Forest Ecology and Management</i> , 179(1-3), 209-221.                                                                 | No clear urban/rural distinction          |
| 243 | Xiao-Hui, G., Ming-Yang, C., Ya-Feng, H., Tuan-Tuan, D., Sha, Z., Hai-Li, Y., & Lian-Xi, X. (2017). The complete mitochondrial genome of the monophagous moth <i>Protegera songi</i> (Lepidoptera: Noctuidae). <i>Conservation Genetics Resources</i> , 9(2), 277-279.                                  | Wrong topic                               |
| 244 | Xu, Z. H., Li, C. H., Liu, J., Yu, K. Y., Gong, C. H., & Tang, M. Y. (2014). Fisher discriminant analysis of <i>Dendrolimus punctatus</i> Walker pest levels. <i>Trans Chin Soc Agric Mach</i> , 45(6), 275-283.                                                                                        | No full text in English                   |
| 245 | Xu, Z., Jiang, Z., Jiang, H., Wu, X., & Liang, X. (2000). Study on biological aspects and control strategies of <i>Pseudasphondylia diospyros</i> (Diptera: Cecidomyiidae). <i>Forest Research</i> , Beijing, 13(1), 57-62.                                                                             | No full text in English                   |
| 246 | Xu, Z.; Huang, X.; Zhang, H.; Liu, J.; Chen, C. (2017). Construction of <i>Dendrolimus punctatus</i> Walker damage characteristic index (DDCI) and pest level identification ability. <i>Disaster Advances</i> 2017;10(3):16-26                                                                         | No full text found                        |
| 247 | Yaman, M., Erturk, O., Unal, S., & Selek, F. (2017). Isolation and identification of bacteria from four important poplar pests. <i>Revista Colombiana de Entomología</i> , 43(1), 34-37.                                                                                                                | No full text in English                   |
| 248 | Yamazaki, K., Kitamoto, T., Yariyama, Y., & Sugiura, S. (2007). An analysis of spatial distribution in the exotic slug caterpillar <i>Parasa lepida</i> (Cramer)(Lepidoptera: Limacodidae) at an urban coastal site in central Japan. <i>The Pan-Pacific Entomologist</i> , 83(3), 193-199.             | Wrong topic                               |
| 249 | Yan, P., & Yang, J. (2018). Performances of urban tree species under disturbances in 120 cities in China. <i>Forests</i> , 9(2), 50.                                                                                                                                                                    | Literature Review                         |
| 250 | Yan, Q., Li, H. D., Chen, Y., Ye, Z. F., You, X. Y., Zhou, J., ... & Dong, S. L. (2018). Identification and field evaluation of the sex pheromone of <i>Orthaga achatina</i> (Lepidoptera: Pyralidae). <i>Journal of chemical ecology</i> , 44(10), 886-893.                                            | Wrong topic                               |
| 251 | Yang, X. H.; Yu, Y. H.; Cao, S. G.; Luo, Y. Q.; Luo, J. T.; Wang, J. J. (2013). Morphology and biology of <i>Endoclyta signifer</i> Walker (Lepidoptera:Hepialidae), a new wood borer on eucalyptus. <i>Forest Research</i> 26(1):34-40.                                                                | No full text in English                   |

|     |                                                                                                                                                                                                                                                                                                        |                         |
|-----|--------------------------------------------------------------------------------------------------------------------------------------------------------------------------------------------------------------------------------------------------------------------------------------------------------|-------------------------|
| 252 | Yao, Y.; Zhao, W.; Chang, J.; Qu, Z.; Li, Z. (2012). Investigation of populations of parasitic wasps parasitizing <i>Carposina sasakii</i> Matsumura (Lepidoptera: Carposinidae) in jujube orchards in China, with respect to the wasp-host relationship. <i>Acta Ecologica Sinica</i> 2(12):3714-3721 | No full text in English |
| 253 | Yazid, J. B., Chafik, Z., Bousamid, A., & Kharmach, I. B. E. Z. (2020). Population dynamics and seasonal occurrence of mediterranean fruit fly ( <i>Ceratitis capitata</i> wiedemann, 1824) in moulouya perimeter north east of Morocco. <i>Indian Journal of Ecology</i> , 47(2), 564-569.            | No full text in English |
| 254 | Zhang, C. Q., & Xu, B. C. (2012). First Report of Anthracnose in Chinese Hickory ( <i>Carya cathayensis</i> ) Caused by <i>Colletotrichum gloeosporioides</i> in China. <i>Plant Disease</i> , 96(12), 1825-1825.                                                                                      | No full text available  |
| 255 | Zhang, H., Wei, Z., Liu, X., Zhang, J., & Diao, G. (2021). Growth and decline of arboreal fungi that prey on <i>Bursaphelenchus xylophilus</i> and their predation rate. <i>Journal of Forestry Research</i> , 1-11.                                                                                   | No specific impact      |
| 256 | Zlatkovi, M., Kea, N., Wingfield, M. J., Jami, F., & Slippers, B. (2016). <i>Botryosphaeriaceae</i> associated with the die-back of ornamental trees in the Western Balkans. <i>Antonie Van Leeuwenhoek</i> , 109(4), 543-564.                                                                         | No full text in English |
