# Supplementary material for: Tree insect pests and pathogens: a global systematic review of their impacts in urban areas
Source: Springer Nature journal article supplement (doi:10.1007/s11252-022-01317-5), 2023-02-20
Supplement: MOESM5 [file 24048286]

**Table 1** Relative variance types used in the different studies

| <b>Impact category</b>                   | <b>Quantification</b>                                                    | <b>Measure</b>                                                        | <b>Frequency of use</b>                             |   |
|------------------------------------------|--------------------------------------------------------------------------|-----------------------------------------------------------------------|-----------------------------------------------------|---|
| Ecological/<br>Environmental<br>(n = 95) | area (ha)                                                                | Actual area infested or damaged                                       | 3                                                   |   |
|                                          |                                                                          | Potential area infested or damaged                                    | 2                                                   |   |
|                                          | % or proportion                                                          | Proportion infested or damaged (of specified area)                    | 8                                                   |   |
|                                          |                                                                          | Proportion killed (of specified area)                                 | 4                                                   |   |
|                                          |                                                                          | Within-tree proportion damaged (e.g., defoliation)                    | 3                                                   |   |
|                                          |                                                                          | Potential area within trees infested or damaged                       | 1                                                   |   |
|                                          |                                                                          | Potential proportion of canopy loss                                   | 1                                                   |   |
|                                          |                                                                          | Changes in tree health conditions                                     | 1                                                   |   |
|                                          |                                                                          | Changes in plant physiology (e.g., evapotranspiration)                | 1                                                   |   |
|                                          |                                                                          | Changes in plant mechanical features (e.g., tensile response)         | 3                                                   |   |
|                                          |                                                                          | Changes in soil properties (e.g., C and N levels)                     | 1                                                   |   |
|                                          |                                                                          | counts                                                                | Actual number of trees infested or damaged          | 1 |
|                                          |                                                                          |                                                                       | Potential number of trees infested or damaged       | 1 |
|                                          |                                                                          |                                                                       | Actual number of trees killed                       | 4 |
|                                          |                                                                          |                                                                       | Potential number of trees killed                    | 4 |
|                                          |                                                                          |                                                                       | Actual number of specific damage (e.g., exit holes) | 2 |
|                                          | Actual number of associated species abundance or presence (e.g., larvae) |                                                                       | 2                                                   |   |
|                                          | metrics                                                                  | Rise (fall) in associated species abundance or presence (e.g., birds) | 1                                                   |   |
|                                          |                                                                          | Size of damage (e.g. leaf damage)                                     | 3                                                   |   |
|                                          |                                                                          | Loss of carbon sequestration (e.g., tones)                            | 1                                                   |   |
| risk ratios                              | Specific damage categories (e.g., of bark or ecosystem services loss)    | 2                                                                     |                                                     |   |
| Social /<br>Cultural<br>(n = 35)         | %                                                                        | Proportion of respondees affected (e.g., allergies)                   | 3                                                   |   |
|                                          |                                                                          | Potential proportion of respondees affected                           | 1                                                   |   |
|                                          | counts                                                                   | Actual numbers of respondees affected                                 | 2                                                   |   |
|                                          |                                                                          | Potential numbers of respondees affected                              | 1                                                   |   |
|                                          |                                                                          | Rise (fall) in specific crime                                         | 1                                                   |   |
|                                          | risk ratios                                                              | Rise (fall) in specific sounds                                        | 1                                                   |   |
|                                          |                                                                          | Specific health outcomes (e.g., rashes)                               | 1                                                   |   |
|                                          |                                                                          | \$                                                                    | Health costs                                        | 1 |
| Loss of landscape value                  | 1                                                                        |                                                                       |                                                     |   |
| Economic<br>(n = 24)                     | \$<br>(total, per area,<br>per tree, per<br>hour)                        | Pest management costs                                                 | 1                                                   |   |
|                                          |                                                                          | Survey costs                                                          | 1                                                   |   |
|                                          |                                                                          | Estimated suppression costs (purchase & pesticide application)        | 3                                                   |   |
|                                          |                                                                          | Removal and replacement costs                                         | 9                                                   |   |
|                                          |                                                                          | Potential removal and replacement costs                               | 1                                                   |   |
|                                          |                                                                          | Support and overhead                                                  | 1                                                   |   |
|                                          |                                                                          | Potential loss of value (from removal/mortality)                      | 2                                                   |   |
|                                          |                                                                          | Estimated economic costs                                              | 1                                                   |   |
|                                          |                                                                          | Loss of property value                                                | 2                                                   |   |
|                                          |                                                                          | Loss of air pollution removal                                         | 1                                                   |   |
|                                          |                                                                          | Actual human health treatment costs                                   | 1                                                   |   |
